# Supplementary material for: Computational Lipidomics of the Neuronal Plasma Membrane
Source: PubMed Central journal article supplement — Biophys J. 2017 Nov 4;113(10):2271–80. doi: 10.1016/j.bpj.2017.10.017 (PMC5700369; doi:10.1016/j.bpj.2017.10.017), 2017-11-04
Supplement: mmc1.pdf [file mmc1.pdf]

**Biophysical Journal, Volume 113**

**Supplemental Information**

**Computational Lipidomics of the Neuronal Plasma Membrane**

**Helgi I. Ingólfsson, Timothy S. Carpenter, Harsh Bhatia, Peer-Timo Bremer, Siewert J. Marrink, and Felice C. Lightstone**

## Supporting Material for:

# Computational lipidomics of the neuronal plasma membrane

Helgi I. Ingólfsson, Timothy S. Carpenter, Harsh Bhatia, Peer-Timo Bremer, Siewert J.

Marrink, and Felice C. Lightstone

## Supplementary Methods

### Lipid compositions

For the composition of the **Average** plasma membrane (PM) we used the idealized mammalian PM mixture described in (1). The **Average** mixture is composed of 63 different Martini lipid types asymmetrically distributed between the outer and inner membrane leaflets (Figure 1A). Different regions within the brain, and different cell types can have diverse membrane compositions (2-4). However, properly isolating large numbers of specific cell types can be extremely difficult. Thus, given the type of neural lipidomic data available, it was more sensible to construct a model that possessed the general properties of membranes found within the brain. The **Brain** composition represents the lipid composition of human brain tissue or more specifically a typical human neuronal PM mixture. The lipid compositions between different tissue types can vary greatly (5, 6) but specific numbers are hard to determine as a cell membrane lipid compositions can vary with cell type, age, diet, environment and disease state (5, 7-12). To capture a **Brain** PM composition, we did not base our composition on a single brain lipidomic study but a consensus from a number of studies (6, 13-24), and how those vary compared to the **Average** mixture. An overview of the **Brain** and the **Average** compositions is given in Figure 1. The specific lipid types used, their ratio in the outer/inner leaflets, and the lipid counts in the simulations are listed in Table S1. The average percentages of the main headgroup types were adjusted to match average consensus values from (13, 14, 16, 17, 21-24). The main differences being that the **Brain** has a significantly higher cholesterol content. The **Brain** mixture also has less PC and more PE. The **Brain** has less SM but includes cerebroside that are not present in the **Average** model. PIPs and PI lipids can be hard to resolve in lipidomic studies (25, 26) and were kept at similar concentration as in the **Average** mixture. Additionally, the tail length distributions and tail saturation was adjusted based on reported distribution of PC, PE and SM lipids in (6, 18, 20, 21) as well as overall saturated, monounsaturated, and polyunsaturated distributions from (6, 20).

## Force fields

The Martini coarse-grain (CG) model (27, 28) was used for all simulations and all the lipid force fields used can be found at the Martini portal ([www.cgmartini.nl](http://www.cgmartini.nl)). The newest available lipid model was used in all cases except where indicated. New lipid parameters were constructed according to the standard Martini 2.0 lipid building blocks and rules (27, 28) as detailed in (1, 29) using the *lipid-martini-itp-v06.py*; available at the at the Martini portal. The names as well as the Martini CG tail bead composition of all the lipids used in the average mammalian plasma membrane (**Average**) and average neuronal plasma membrane (**Brain**) can be found in Table S1. The Martini O tail, representing oleic acid or palmitoleic acid, was recently updated to CDCC (29) instead of the CCDC used in (1). The **Average** mixture is used unmodified from (1) and therefore has the old arrangement, but the new arrangement was tested for the **Average** mixture in the control simulation **Average new all**. The linker for the lyso lipids has also been updated and, similarly, the old arrangement was kept in in the **Average** mixture but the new one used for the **Brain** mixture and the **Average new all** control simulation. The Martini diacylglycerol (DAG) lipids have recently been updated; the GL1 bead type changed from Nda to P1 to better represent the polarity of the glycerol. This change affects the flip-flop rate of the DAG lipids. For direct comparison of the flip-flop rates the old DAG parameters were used in the main simulations but a control simulation with the new parameters was done (**Average new all**). A modified version of the Martini GM1 and GM3 parameters were recently published that better match the size of ganglioside clusters seen with the GROMOS atomistic force field (30). The original GM1/GM3 parameters (1, 31) were used in the main simulations but the modified parameters were tested in a few control simulations (**Average new all**, **Average new GM**, and **Brain new GM**). The cerebroside lipids in the average neuronal plasma membrane (**Brain**) are modeled by the Martini GS headgroup, a general model for glucosylceramide and galactosylceramide (31).

## Detailed simulation set up

The simulations were run using the GROMACS 4.6.7 simulation package (32) using the standard Martini parameters set; called *common* in (33). The simulations were set up following the same protocol as described in (1). In short, the initial configuration of each membrane was set up using the bilayer builder *insane* (29). Each system was energy-minimized (steepest descent, 1500 steps) and simulated for 0.5 ns using a short time step of 10 fs, followed by production runs using a time step of 20 fs. In the production runs large membrane undulations were restricted using weak position restraints ( $2 \text{ kJ mol}^{-1} \text{ nm}^{-2}$ ) on the PO4 bead Z-direction of DPPC, POPC and PIPC lipids in the outer leaflet; see Ingólfsson *et al.* (1) supplementary information for control simulations exploring the effects of these restraints. To explore the effects of undulations simulations with no restraints and weaker restraints ( $0.2 \text{ kJ mol}^{-1} \text{ nm}^{-2}$ ) were also run. The number of lipids in the outer/inner leaflet of each bilayer mixture was adjusted based on independent  $1 \mu\text{s}$  long simulation with symmetrical composition of each leaflet. In these simulations bilayer undulations were suppressed to get better estimates of the average area per

lipid without undulations; this was done by imposing the same *Z*-directional position restraints as above but with a force constant of  $100 \text{ kJ mol}^{-1} \text{ nm}^{-2}$ . The cholesterol distribution between the outer/inner leaflet was equilibrated using the same protocol as described in (1). The initial mixture was started with 50/50 cholesterol distribution: average area per lipid was measured in a pair of symmetrical outer/inner mixture simulations; asymmetrical simulations setup with adjusted number of lipids in either leaflet; the cholesterol distribution was allowed to equilibrate for a few  $\mu\text{s}$ ; cholesterol leaflet distribution was measured and used as the new initial values for the next round of simulations. This process was iterated until the initial cholesterol concentration was stable.

The final lipid numbers for the large ( $\sim 20,000$  lipids) **Average** and **Brain** simulations are listed in Table S1. The smaller ( $\sim 6,000$  lipids) control simulations have the same relative lipid ratios as the larger simulations. Additionally, the simulations include counter ions, 150 mM NaCl, and  $\sim 300,000$  Martini water molecules for the larger simulations and  $\sim 100,000$  for the smaller. The simulations were run at 310 K, with  $\tau_T = 1.0 \text{ ps}$ , controlled with the velocity rescaling thermostat (34) and at 1 bar semi-isotropic pressure, with  $\tau_p = 5.0 \text{ ps}$ , controlled using the Parrinello-Rahman barostat (35). The larger simulations were run for 80  $\mu\text{s}$  and the smaller control simulations for 50  $\mu\text{s}$ . Additionally, simulations with no or weaker undulation restraints were run for 5  $\mu\text{s}$  starting from the larger simulations at 75  $\mu\text{s}$ .

All simulation times reported are actual times simulated and were not scaled. CG models have less degrees of freedom compared to their atomistic counterparts and therefore normally less friction which leads to overall faster dynamics. The effective speedup varies depending on the molecule and system in question but for Martini the speedup is often pegged at around 4-fold (28).

## Analysis

The average area per lipid ( $A_l$ ) of the outer and inner leaflet of the **Average** and **Brain** lipid mixtures were estimated individually in simulations of symmetric bilayers containing 6,000-7,000 lipids of the outer or the inner lipid mixtures. The simulations were kept flat using strong position restraints, force constant  $100 \text{ kJ mol}^{-1} \text{ nm}^{-2}$  (see above) and simulated for 1  $\mu\text{s}$ . The  $A_l$  was estimated as the average box area of the last 100 ns divided by the number of lipids in each leaflet; resulting in outer/inner  $A_l$  of 0.513 / 0.553 and 0.460 / 0.485  $\text{nm}^2$  for the **Average** and **Brain**, respectively, with standard error  $\sim 0.001 \text{ nm}^2$ .

A lipid flip-flop is defined when a lipid moves from one leaflet to another and flip-flop rates were measured as described in (1). The **Brain** membrane thickness fluctuates somewhat more than the **Average** membrane, therefore, we extended the cutoff length for what is considered within a leaflet to 1.1 nm removing spurious flip-flop event. Lipid flip-flop rates were calculated for all lipid classes and averaged over the last 10  $\mu\text{s}$  of the simulations. During the simulations, only the CHOL, DAG and ceramide (CER) lipid types flip-flopped. The measured flip-flop rates per molecule are: CHOL  $7.290 \pm 0.018 \times 10^6 \text{ s}^{-1}$ , DAG  $7.662 \pm 0.049 \times 10^6 \text{ s}^{-1}$ , and

CER  $2.7 \pm 0.6 \times 10^4 \text{ s}^{-1}$  and CHOL  $4.820 \pm 0.004 \times 10^6 \text{ s}^{-1}$ , DAG  $2.800 \pm 0.074 \times 10^6 \text{ s}^{-1}$ , and CER  $1.5 \pm 0.5 \times 10^4 \text{ s}^{-1}$  for the **Average** and **Brain** membranes, respectively. The error is estimated as the standard error of the mean when the last 10  $\mu\text{s}$  of the simulations were split in three equally sized blocks and analyzed separately. Flip-flop rates for the alternative parameter control simulations are given in the legend of Figure S7.

Cholesterol fraction in the bilayer middle was determined by counting the number of cholesterols whose ROH bead was within 0.8 nm of the bilayer center averaged over the last 10  $\mu\text{s}$  of the simulations.

In order to explore undulation in lipid bilayers, we project the headgroups on an approximate surface representing the bilayer membrane, and compute properties, such as area per lipid, curvature, and normals on these projections. In particular, given the positions of the headgroups,  $P_i$ , the undulations in bilayers can be captured using the following steps:

1. The lipid bilayer leaflets were defined using the MDAnalysis leaflet finder (36). The top headgroup bead was used for all lipids, except for the Glyco, PI and PIP lipids; where the GM1 and C1 beads were used. Initially, the outer and inner leaflets were defined from all non-flip-flopping lipids, then for each simulation frame the flip-flopping lipids with headgroup beads within 1.2 nm of either leaflet were included in those leaflets.
2. Surface fitting requires consistently oriented normal vectors  $n_i$  for each  $P_i$ . Normals are computed using the principal component analysis (PCA) in the local neighborhood around  $P_i$ , and oriented consistently through a depth-first traversal of the distance-based minimum spanning tree of  $P_i$  (37). Finally, using the Poisson reconstruction method (38) on  $(P_i, n_i)$ , an approximate surface,  $\Psi$ , is obtained as a representative of the bilayer membrane. The Poisson reconstruction is a global solution, and is chosen because it provides a natural way to smooth noisy fluctuations in the given points, while maintaining the overall shape of the surface.
3. The obtained surface,  $\Psi$ , is then projected onto the 2D Euclidean plane, giving  $\Psi^\circ$  using discrete harmonic mapping (39), which allows keeping the angular distortion to a minimum. The given positions of the headgroups,  $P_i$ , are then projected on  $\Psi$ , giving  $P_i^\Psi$ . Using the surface projection obtained above, these points are then projected to the 2D plane, giving  $P_i^\circ$ . Using two projections, i.e.,  $P_i \rightarrow P_i^\Psi \rightarrow P_i^\circ$  allows minimizing distortion to the curvature and area per lipid, and thus, provides better approximation of the said properties, as compared to directly projecting the points onto the 2D plane.
4. A periodic 2D Delaunay triangulation is then performed on  $P_i^\circ$ , which establishes a neighborhood graph,  $\mathcal{T}$  between  $P_i^\circ$ , and hence,  $P_i$ . Given the connectivity  $\mathcal{T}$  on the original points  $P_i^\Psi$ , we compute bilayer normals,  $N_i$ . Note that, using the triangulation enables a more accurate estimation of bilayer normals as compared to those computed in Step 2. Finally, we quantify the undulations in bilayers as the angle between the bilayer normal  $N_i$  and upward z-axis, i.e.,  $b_i = \cos^{-1}(|N_i^z|)$ .

Lipid tail order was evaluated using the lipid tail order parameter ( $S$ ), defined as:

$$S = \frac{1}{2} (3 \langle (\cos \theta)^2 \rangle - 1).$$

where  $\theta$  is the angle between the vector along a particular lipid tail bond and the bilayer normal at the given lipid. The bilayer normal,  $N_i$ , is defined from the bilayer surface as described above. Tail order was evaluated for each lipid tail of each lipid type separately for the outer and inner leaflets, except for DAG and CER lipids that flip-flop between the leaflets. The absolute average order parameter of a particular lipid tail up to the lipids linker (AM or GL beads) was used for comparing the different tails overall order/flexibility, see Table S2. The weighted average order parameters (excluding lipids that flip-flop) are: **Average** [0.435,0.374] / [0.430,0.301] and **Brain** [0.487,0.391] / [0.444,0.224], respectively for the [sn-1, sn-2] tails in the outer/inner leaflet. For both the **Average** and **Brain** membranes the inner leaflet tails are less ordered than the outer leaflet but the difference is significantly greater in the **Brain** membrane. The increased tail order (excluding DAG and CER lipids) in the outer with respect to the inner is 11% for the **Average** and 31% for the **Brain**. The lipid tail lengths vary between the different lipid types, therefore, we also evaluated the tail order using  $S$  at pos3 (between beads 2 and 3, present in all non-sterol lipids). Combining the lipid tails and calculating the weighted average between all lipids at pos3 the order in the outer/inner leaflet is: **Average** 0.412/0.349 and **Brain** 0.445/0.301, with a weighted error of  $\sim 0.001$  or less. That is an increase of 18% and 48% for the outer over the inner leaflet of the **Average** and **Brain** membranes, respectively.

The lipid lateral diffusion coefficients ( $D$ ) were calculated from the mean square displacement (MSD) of the molecules in each membrane plane. The GROMACS `g_msd` tool was used over the last 10  $\mu$ s of the simulations to obtain the diffusion coefficients and errors. The MSD curves, excluding the first and last 10% of each curve, were fitted to  $y = 4Dt + c$ , to obtain  $D$ . For each lipid type the GL1, AM1 or ROH bead was used for the glycerol, ceramide or cholesterol lipids, respectively. All diffusion values are reported in Table S3. Note, lipid diffusion coefficients are reported as is and no correction is applied for overestimates due to the larger effective simulation speed of CG simulations (28) or underestimates due to the periodically bound finite system sizes (40).

Lipid neighbor counting was used to evaluate non-ideal lipid mixing, Figure S2. Lipids in the same leaflet and within a 1.5 nm radius XY plane cut-off were considered as neighbors, values were averaged over the last 10  $\mu$ s of the simulations and their relative enrichment/depletion compared to random mixing, see detailed description of method in (1).

For an indicator of overall lipid mobility lipid root mean square fluctuations (RMSF) over the last 2  $\mu$ s were used (Figure S3A and B). RMSF were calculated for all non-flip-flopping lipids based on their GL1 or AM1 beads using the GROMACS `g_rmsf` tool and plotted onto of their corresponding beads at 80  $\mu$ s.

Bilayer thickness plots were created by calculating the local average distance in the Z-direction between the phosphate beads (PO4) and the first headgroup bead of the glycolipids (GM1 or C1) in the two leaflets, averaged over the last 2  $\mu$ s the simulations, and plotted using the tool `g_thickness` (41). The plot was subsequently drawn using bins of 1.42 x 1.42 nm and a

color scale varying from 3.6 to 4.4 nm (Figure S3C). Average bilayer thickness was determined in five blocks over the last 10  $\mu$ s the simulations resulting in  $4.109 \pm 0.001$  nm for the **Average** and  $4.057 \pm 0.002$  for the **Brain**.

Lipid flow analysis was carried out on the last 2  $\mu$ s of the simulations using the methodology described by Chavent *et al.* (42). The trajectories were firstly pre-processed to remove the center of mass motion and subjected to low-pass filtering to remove high frequency noise using the GROMACS `g_filter` function. The filtering of the systems was carried out over a time scale of 200 ns. The leaflet correlation function,  $C_l(t)$ , at time  $t$ , as taken from Chavent *et al.* (42), defined as:

$$C_l(t) = \frac{1}{N} \sum_{i=1}^N \frac{\vec{u}_{i(t)} \cdot \vec{v}_{i(t)}}{|\vec{u}_{i(t)}| |\vec{v}_{i(t)}|}$$

The system is divided into a grid of cells, where  $N$  is the number of non-empty cells in the grid, and  $\cdot$  denotes the scalar product of vectors  $u_{i(t)}$  and  $v_{i(t)}$  as defined as the distance between the center of mass of the constituent lipids at time  $t+dt$  and at time  $t$ .  $u_{i(t)}$  and  $v_{i(t)}$  are the lower and upper leaflet vectors.

Lipid clustering based on cholesterol density. To define lipid domains a kernel density estimator was used to define a cholesterol density. After several experiments with different kernel bandwidths a Gaussian kernel  $K(x,y) = \exp(-\|x-y\| / s^2)$  with  $s = 3$  nm was chosen as a good balance between smoothing local variations and detecting small, transient domains. Given the density value at each cholesterol a periodic Delaunay triangulation was computed using the CGAL library (Computational Geometry Algorithms Library, [www.cgal.org](http://www.cgal.org)). Finally, domains for high/low cholesterol were defined using density thresholds. More specifically, regions of high cholesterol were defined as connected components of the Delaunay triangulation above a given threshold and regions of low cholesterol symmetrically as connected components below a given threshold. To efficiently explore the impact of different threshold choices the topological analysis framework described in (43, 44) was used to encode all domains for all possible thresholds in form of a so called merge-/split-tree. This is equivalent to a traditional isosurface extraction but computationally more efficient. Domain size was defined as the number of cholesterol part of each lipid domain.

The cross-correlations between the cholesterol density of the outer/inner leaflet was calculated for every 5 ns of the simulations. The cholesterol densities were resampled to a 128x128 pixel grid and the Pearson correlation calculated between the leaflets, Figure 3C. Average values over the last 10  $\mu$ s of the simulations are  $0.45 \pm 0.01$  and  $-0.14 \pm 0.01$  for the **Average** and **Brain** mixtures, respectively, where the error was estimated by splitting the last 10  $\mu$ s into four equal parts and calculating the standard error between the averages of the parts.

Density maps were calculated in the bilayer XY-plane, with a bin size of  $\sim 2$  nm. One bead per lipid was used, as indicated, and averaged over the last 2  $\mu$ s of the simulations.

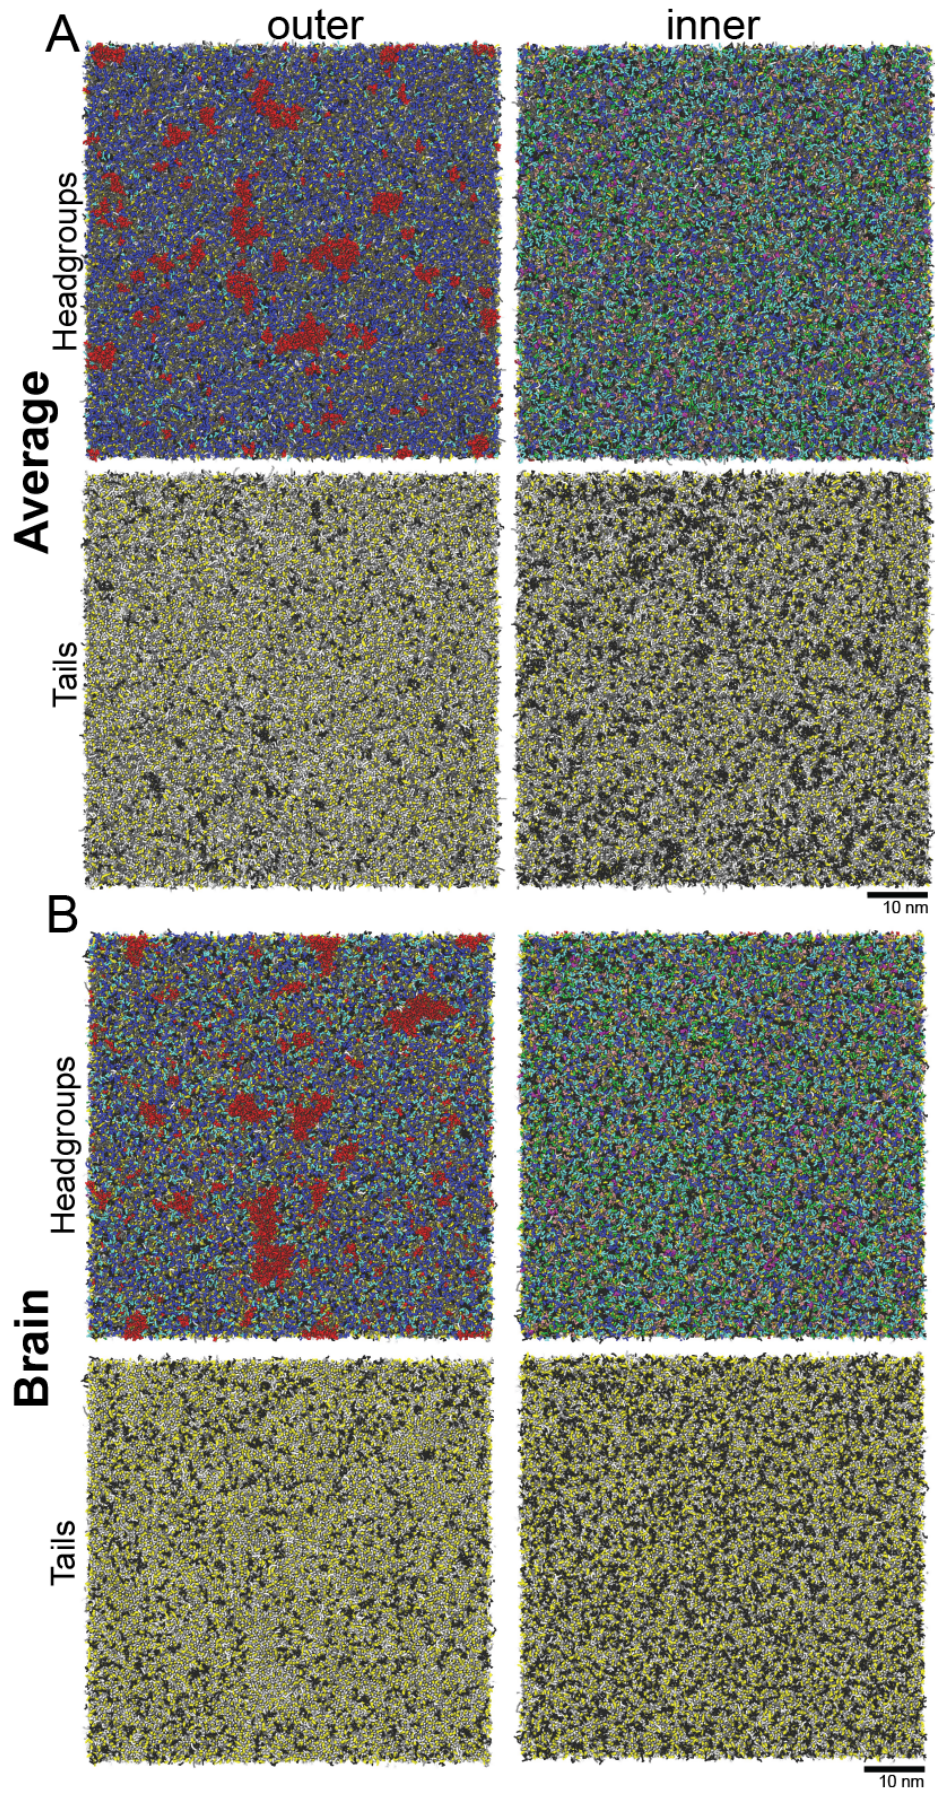



**Figure S1.** Lipid headgroup and tail configuration. Snapshots of the outer/inner leaflets of the **Average** (A) and **Brain** (B) mixtures after 80  $\mu$ s of simulation. The snapshots are shown with the headgroups and without to illustrating the tails; the color scheme for the lipid headgroups and tails is the same as used in Fig. 1. The lipids are colored by type (PC, blue; SM, gray; PE, cyan; Glyco, red; PIPs, magenta; PI, pink; PS, green; PA, white; CE, ice blue; DG, brown; LPC, orange; CHOL, yellow,) and tails by number of saturations (0, white; 1, light gray; 2, dark gray; 3-6, black) and cholesterol shown in yellow.

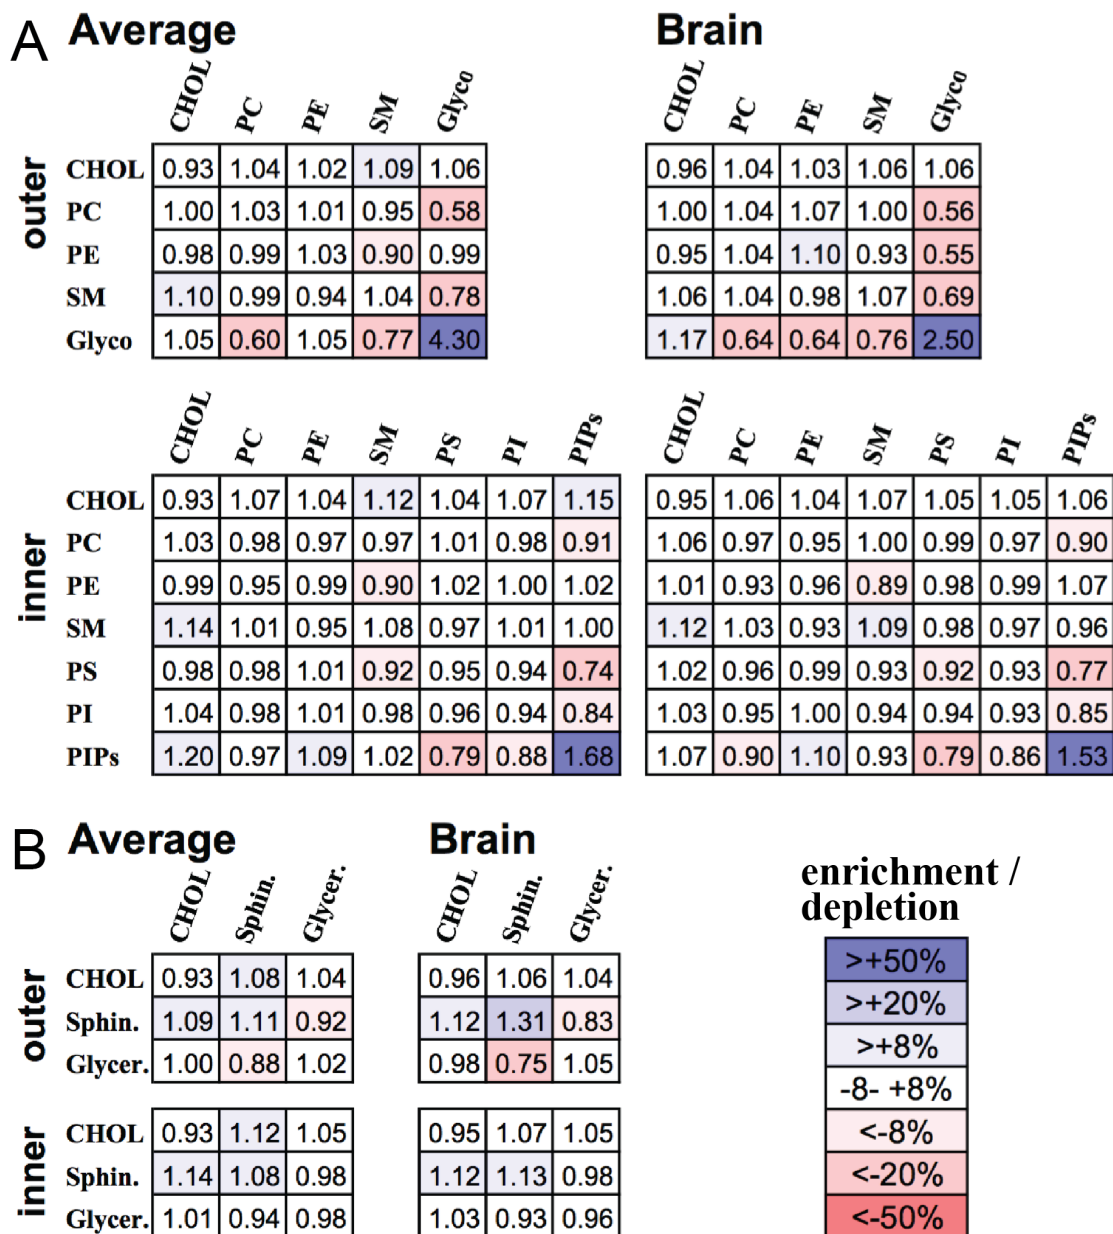

**Figure S2.** Non-ideal lipid mixing. Number of neighboring lipids (within 1.5 nm) grouped by headgroup type (A) and linker type (B); where Sphin. are sphingolipids and Glycer. are glycerolipids. Values are averaged over the last 10  $\mu$ s of the simulation and normalized to the weighted average number of neighbors of each type to highlight the relative enrichment/depletion of those lipids. Standard errors for all counts are  $<0.03$ .

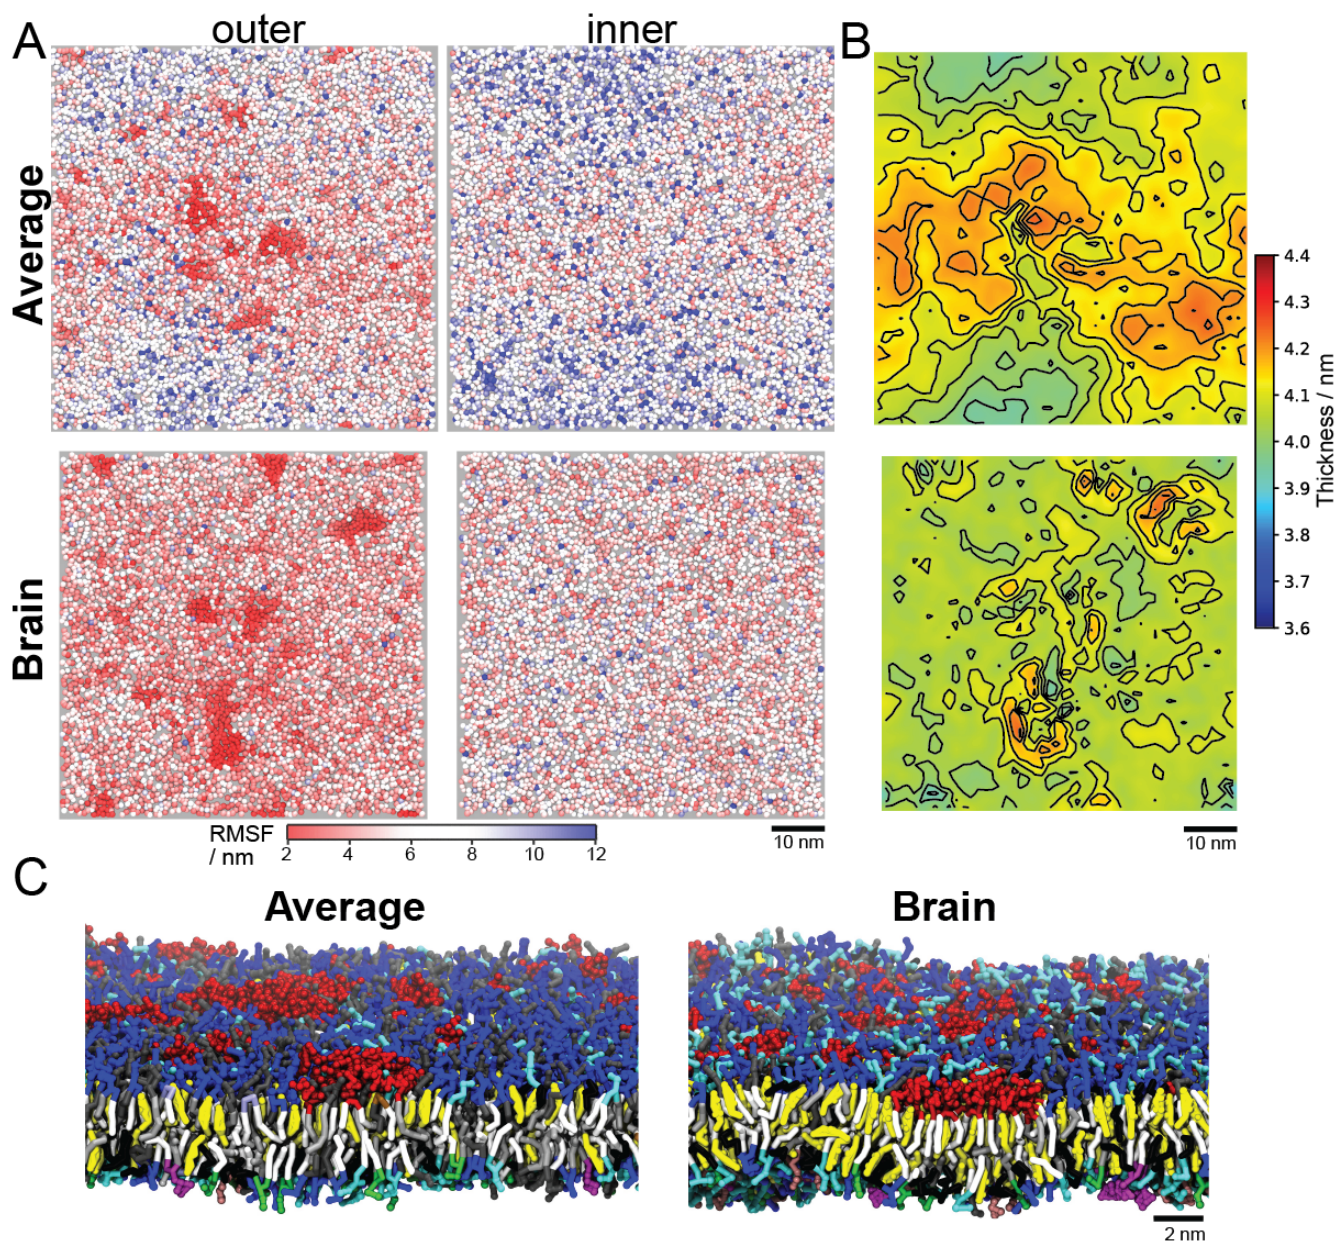

**Figure S3.** Membrane domain properties. (A) PM lipid root mean square fluctuations (RMSF) are shown to indicate differences in lipid mobility. RMSF values were calculated for the GL1 and AM1 linker beads of all non-flip-flopping lipids over the last 2  $\mu$ s of the simulations and plotted onto the bead positions at 80  $\mu$ s. Note, the dark red clusters in the outer leaflets of both the **Average** and **Brain** corresponds to clusters of glycolipids. (B) 2D PM thickness plots, calculated between all PO4 beads in either leaflets. The average thickness is similar between the PMs (4.11 nm for the **Average** and 4.06 nm for the **Brain**). (C) Representative zoomed in snapshots for the **Average** and **Brain** PM side and outer leaflet. The lipids are colored in the same way as in Fig. 1. Somewhat tighter packing and more local undulations can be seen in the **Brain** mixture, despite same method for reducing large undulations.

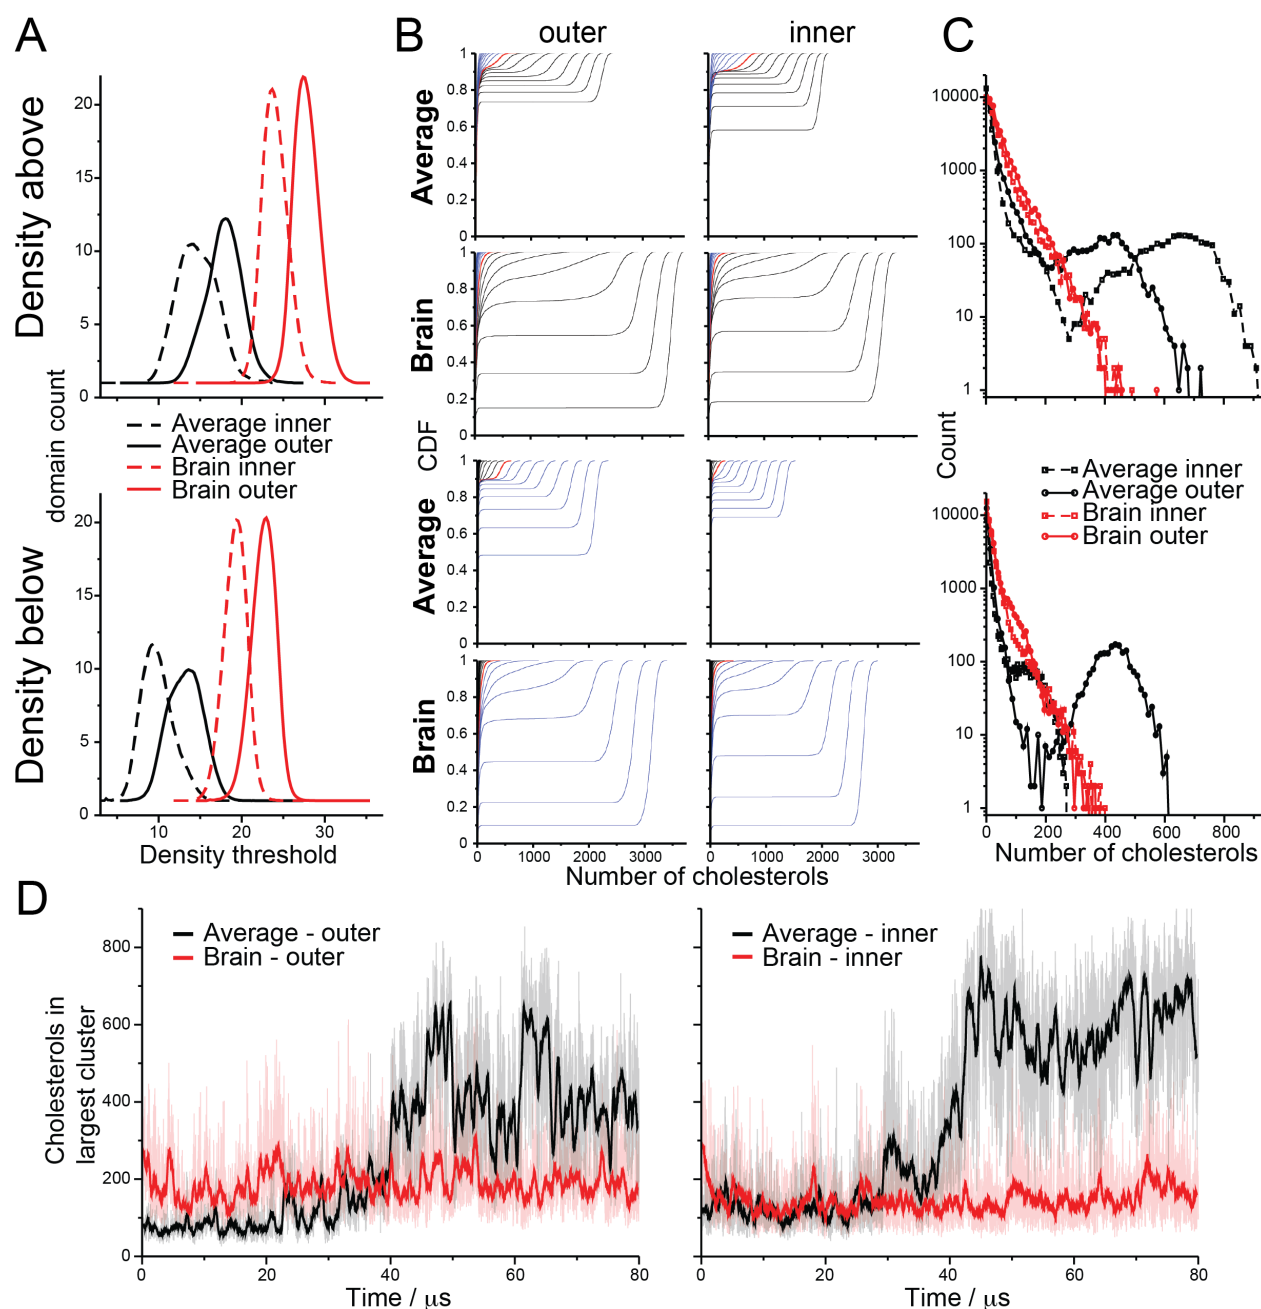

**Figure S4.** Cholesterol density cluster parameter sensitivity. (A) For the outer (solid lines) and inner (dotted lines) leaflets of the **Average** (black) and **Brain** (red) membranes the average number of domains per frame were computed over the last 10  $\mu\text{s}$  for a range of possible thresholds. The top panel is numbers with higher density than specified (high-density regions) and the bottom panels is lower density than specified (low-density regions). (B) The cumulative distribution function (CDF) of domain “sizes” (number of cholesterol) for a range of thresholds. The selected threshold (max of A) is shown in red: [18.1, 13.6] / [14.0, 9.4] and [27.4, 23.0] / [23.7, 19.4] for the **Average** and **Brain** [high, low] outer/inner, respectively. Additionally, x8 lower thresholds in blue and x8 higher thresholds in black are shown; deviating from the selected threshold in 0.5 increments. (C) Histograms of the domain sizes (in number of cholesterol) at the selected threshold. (A-C) Are averaged over the last 10  $\mu\text{s}$  of the simulations. (D) Size (in

number of cholesterols) of the largest high-density domain in each frame of the **Average** and **Brain** simulations. Shown for every 5 ns (dimmed lines) and average over 500 ns (bold lines).

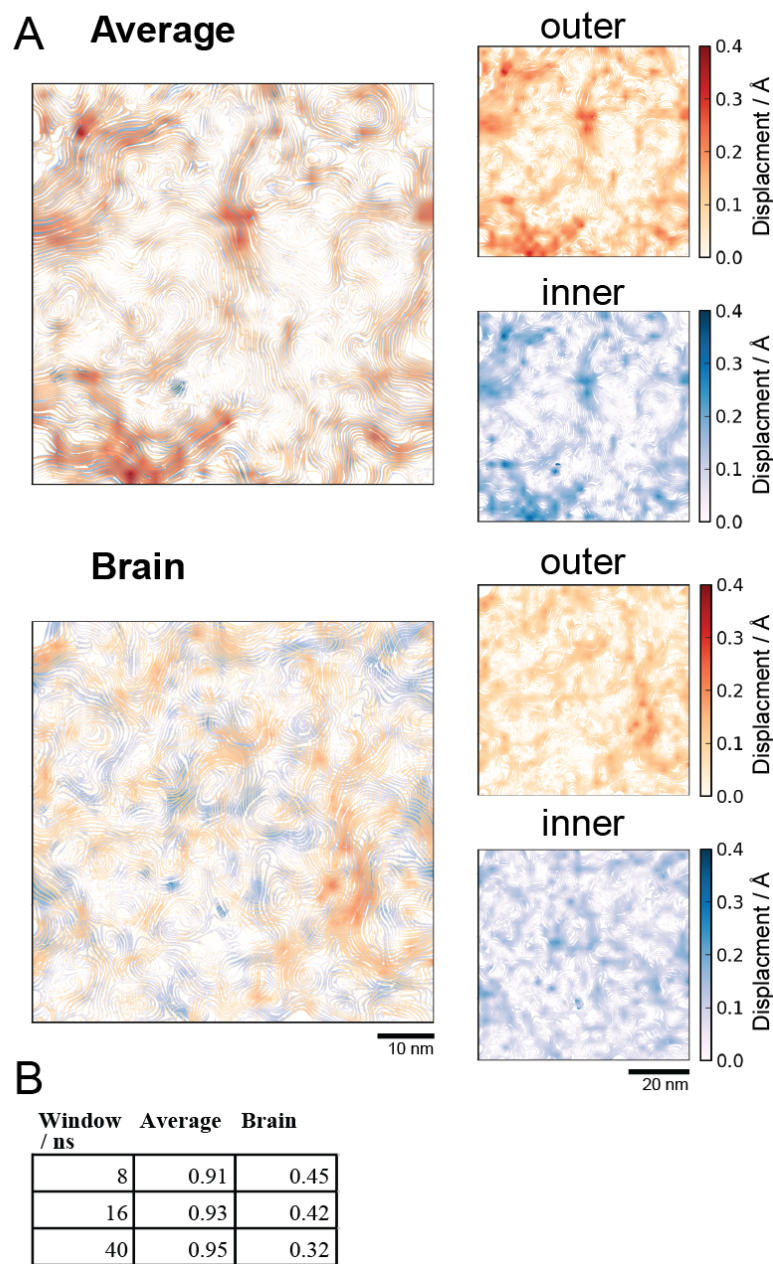

**Figure S5.** Lipid flow analysis. (A) Using sampling over the final 200 ns of each PM simulation, the mean-squared displacement for each lipid leaflet is calculated and tracked using the *flow* methodology (see SI Methods). The average displacement is shown for both the outer (red scale) and inner (blue scale) leaflets separately in the smaller images, and are overlaid together in the larger images to highlight correlations in regions of similar displacement. (B) The inter-leaflet lipid flow correlation is shown as a function temporal smoothing window (ns) to illustrate that the lipid flow of the **Average** PM mixture is highly correlated but the **Brain** mixture not so much, especially over longer timescales.

Figure S6A-B

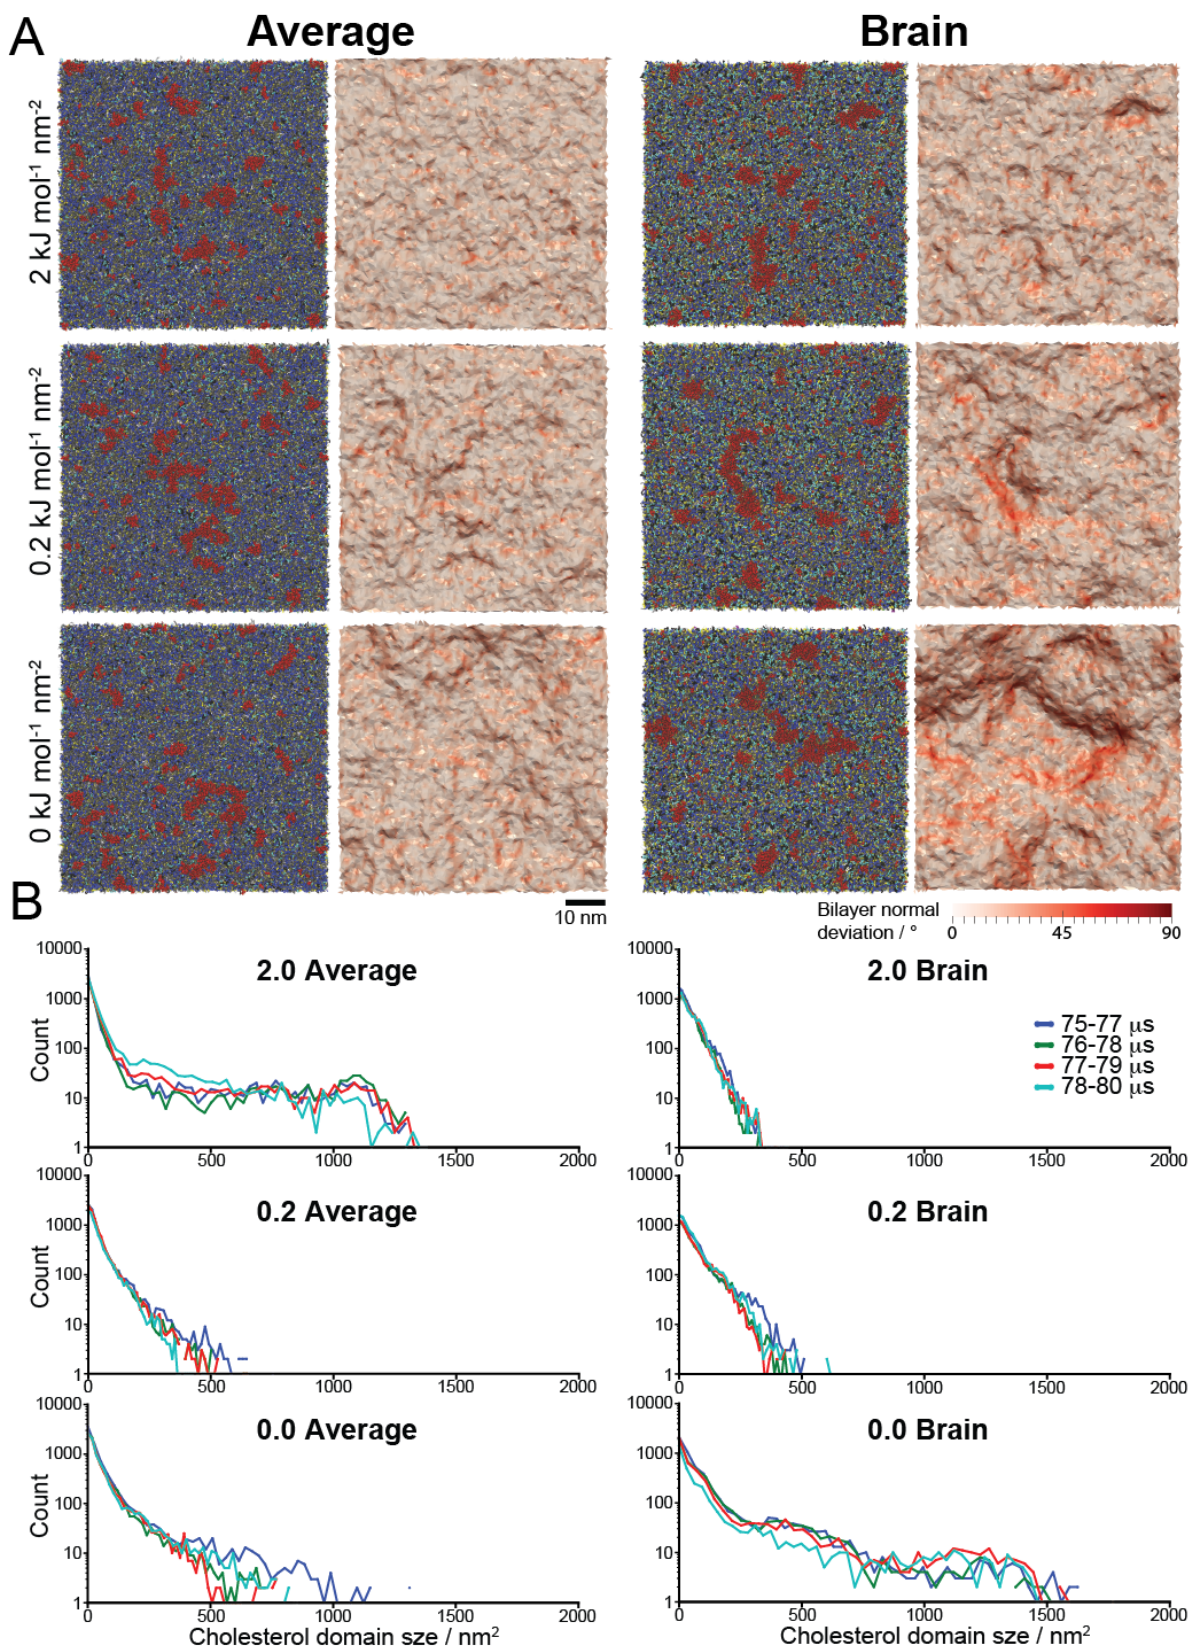

Figure S6C

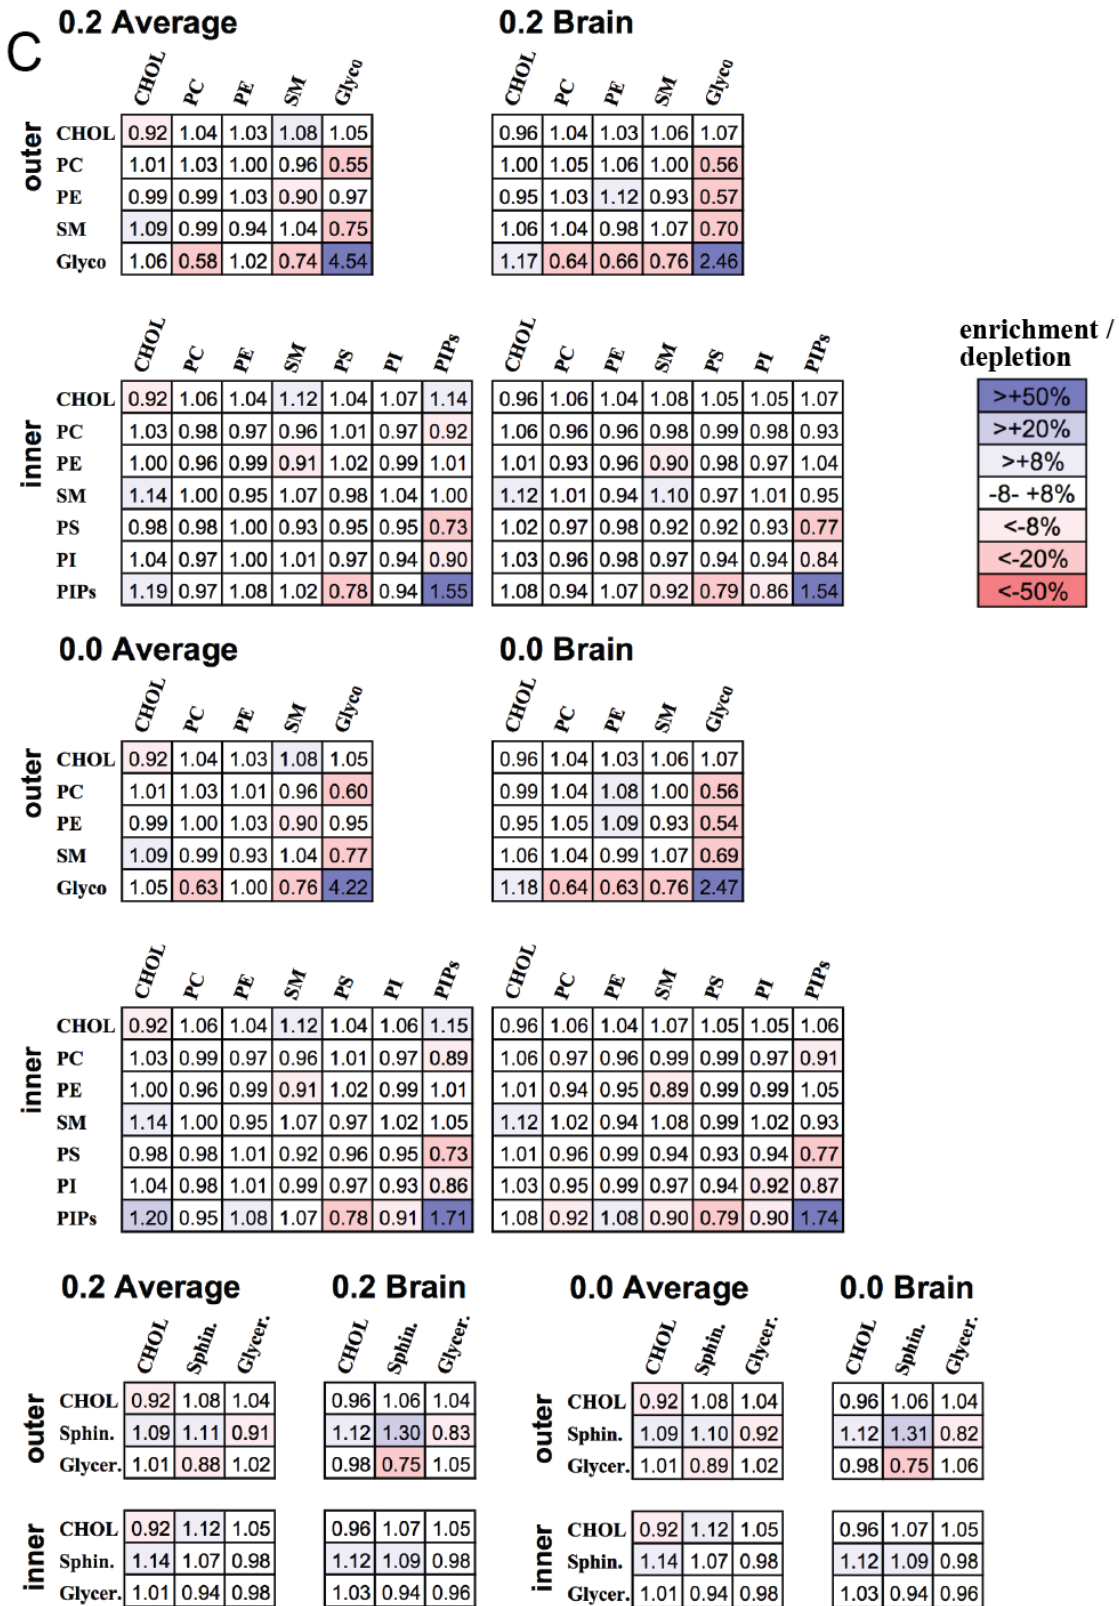



**Figure S6.** Bilayer undulation simulations. Starting from the main **Brain** and **Average PM** simulations at 75  $\mu\text{s}$ , simulations were run for 5  $\mu\text{s}$  with either tenfold weaker, or no restraints on bilayer undulations (0.2 and 0.0  $\text{kJ mol}^{-1} \text{nm}^{-2}$ , respectively), see also Fig. 4. (A) Outer leaflet top view snapshots of the final structure of each simulation are shown. The lipids are colored in the same way as in Fig. 1 and S1. The deviations of the bilayer normal away from the box z-axes (white to red in degrees) are shown on top of the fitted bilayer surfaces. (B) Size histograms of cholesterol enriched domains in the outer leaflet of each simulation, using the threshold that maximizes the number of domains. The histograms were made from 2  $\mu\text{s}$  simulation blocks ranging from the beginning to the end the simulations (75 – 80  $\mu\text{s}$  for the main simulations). (C) Number of neighboring lipids (within 1.5 nm) grouped by headgroup type (top) and linker type (bottom); where Sphin. are sphingolipids and Glycer. are glycerolipids. Values are averaged over the last 2  $\mu\text{s}$  of the simulation and normalized to the weighted average number of neighbors of each type to highlight the relative enrichment/depletion of those lipids. Standard errors for all counts are  $<0.03$ . Value for the main simulations, with 2.0  $\text{kJ mol}^{-1} \text{nm}^{-2}$  undulation restraints are in Fig. S2.

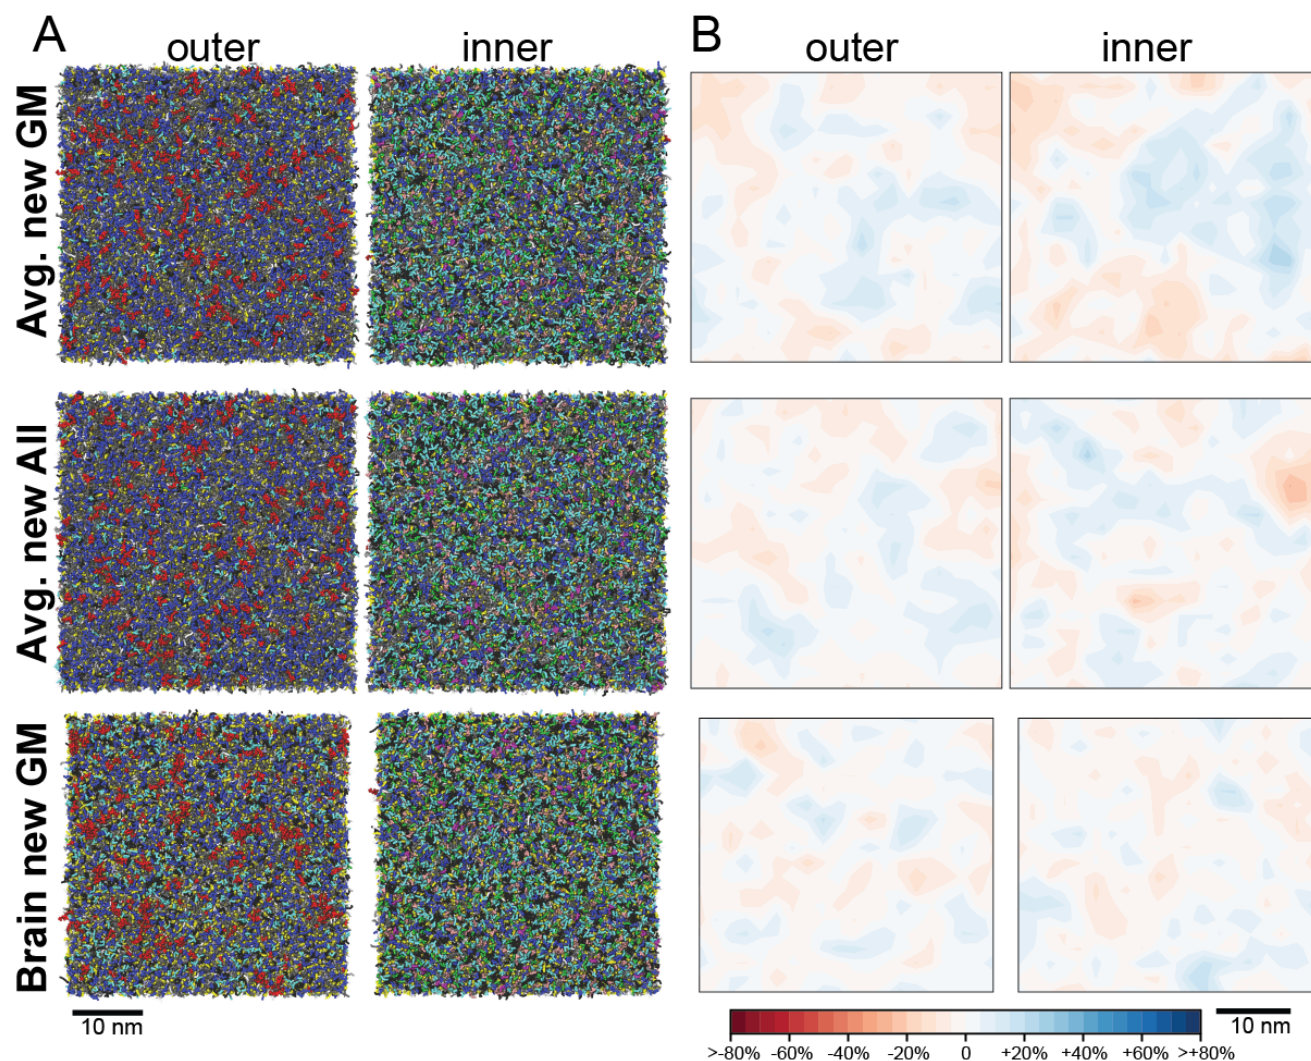

**Figure S7.** Alternative lipid parameters. Smaller repeat simulations ( $\sim 6,000$  lipids) were run for  $50 \mu\text{s}$  with the recently published alternative parameters for GM1 and GM3 (30) (**Avg. new GM** and **Brain new GM**) as well as an **Average** PM mixture with the all the most up-to-date Martini parameters (**Avg. new All**), see Supplementary Methods. (A) Snapshots of the outer/inner leaflet of the simulations after  $50 \mu\text{s}$  are shown using the same color scheme as in Fig. 1. (B) 2D density maps averaged over the last 200 ns are shown for cholesterol's ROH beads in the inner/outer leaflet of each simulations. Average properties including lipid flip-flop rates were also calculated for these control simulations and were similar as their corresponding **Average** or **Brain** larger simulations. Only CHOL, DAG, and CER lipids flip-flopped and their rates are: CHOL  $7.30 \pm 0.07 \times 10^6 \text{ s}^{-1}$ , DAG  $6.2 \pm 0.2 \times 10^6 \text{ s}^{-1}$ , and CER  $1.5 \pm 0.4 \times 10^4 \text{ s}^{-1}$  (**Avg. new GM**); CHOL  $7.79 \pm 0.07 \times 10^6 \text{ s}^{-1}$ , DAG  $3.5 \pm 0.1 \times 10^6 \text{ s}^{-1}$ , and CER  $1.5 \pm 0.4 \times 10^4 \text{ s}^{-1}$  (**Avg. new All**); and CHOL  $4.84 \pm 0.02 \times 10^6 \text{ s}^{-1}$ , DAG  $2.8 \pm 0.1 \times 10^6 \text{ s}^{-1}$ , and CER  $2 \pm 1 \times 10^4 \text{ s}^{-1}$  (**Brain new GM**).

Table S1 Lipid composition<sup>a</sup>

| Lipid tail sn-1                      | Lipid tail sn-2 | Acronym | Average                  |                             |                     |                             | Brain               |                             |                     |                             |
|--------------------------------------|-----------------|---------|--------------------------|-----------------------------|---------------------|-----------------------------|---------------------|-----------------------------|---------------------|-----------------------------|
|                                      |                 |         | Outer leaflet count      | Outer leaflet mole fraction | Inner leaflet count | Inner leaflet mole fraction | Outer leaflet count | Outer leaflet mole fraction | Inner leaflet count | Inner leaflet mole fraction |
| <b>Phosphatidylcholine - PC</b>      |                 |         | <i>outer/inner ratio</i> |                             | <b>0.69</b>         | <b>0.31</b>                 |                     |                             | <b>0.65</b>         | <b>0.35</b>                 |
| CCCC                                 | CCCC            | DPPC    |                          |                             |                     |                             | 531                 | 0.053                       | 284                 | 0.030                       |
| CCCC                                 | CDCC            | POPC    | 1205                     | 0.122                       | 550                 | 0.059                       | 868                 | 0.087                       | 463                 | 0.049                       |
| CDCC                                 | CDCC            | DOPC    | 106                      | 0.011                       | 49                  | 0.005                       | 221                 | 0.022                       | 118                 | 0.012                       |
| CCCC                                 | CDDC            | PIPC    | 1772                     | 0.179                       | 810                 | 0.087                       |                     |                             |                     |                             |
| CCCC                                 | CDDD            | PFPC    |                          |                             |                     |                             | 59                  | 0.006                       | 32                  | 0.003                       |
| CCCC                                 | CDDCC           | PEPC    | 71                       | 0.007                       | 32                  | 0.003                       |                     |                             |                     |                             |
| CCCC                                 | DDDDC           | PAPC    | 283                      | 0.029                       | 129                 | 0.014                       | 463                 | 0.046                       | 247                 | 0.026                       |
| DDDDC                                | DDDDC           | DAPC    | 35                       | 0.004                       | 16                  | 0.002                       |                     |                             |                     |                             |
| CCCC                                 | DDDDDC          | PUPC    | 71                       | 0.007                       | 32                  | 0.003                       | 169                 | 0.017                       | 90                  | 0.010                       |
| CDCC                                 | CDDC            | OIPC    |                          |                             |                     |                             | 59                  | 0.006                       | 32                  | 0.003                       |
| CDCC                                 | DDDDDC          | OUPC    |                          |                             |                     |                             | 42                  | 0.004                       | 22                  | 0.002                       |
| <b>Total:</b>                        |                 |         | <b>3543</b>              | <b>0.357</b>                | <b>1618</b>         | <b>0.173</b>                | <b>2412</b>         | <b>0.242</b>                | <b>1288</b>         | <b>0.136</b>                |
| <b>Phosphatidylethanolamine - PE</b> |                 |         | <i>outer/inner ratio</i> |                             | <b>0.19</b>         | <b>0.81</b>                 |                     |                             | <b>0.35</b>         | <b>0.65</b>                 |
| CCCC                                 | CCDC            | POPE    | 135                      | 0.014                       | 569                 | 0.061                       | 127                 | 0.013                       | 234                 | 0.025                       |
| CDCC                                 | CDCC            | DOPE    | 44                       | 0.004                       | 190                 | 0.020                       |                     |                             |                     |                             |
| CCCC                                 | CDDC            | PIPE    | 90                       | 0.009                       | 380                 | 0.041                       |                     |                             |                     |                             |
| CCCC                                 | CDDDC           | PQPE    | 22                       | 0.002                       | 95                  | 0.010                       |                     |                             |                     |                             |
| CCCC                                 | DDDDC           | PAPE    | 124                      | 0.013                       | 522                 | 0.056                       | 312                 | 0.031                       | 574                 | 0.061                       |
| DDDDC                                | DDDDC           | DAPE    | 78                       | 0.008                       | 332                 | 0.036                       |                     |                             |                     |                             |
| CCCC                                 | DDDDDC          | PUPE    | 44                       | 0.004                       | 190                 | 0.020                       | 500                 | 0.050                       | 922                 | 0.097                       |
| DDDDDC                               | DDDDDC          | DUPE    | 22                       | 0.002                       | 95                  | 0.010                       |                     |                             |                     |                             |
| CDCC                                 | CDDC            | OIPE    |                          |                             |                     |                             | 14                  | 0.001                       | 27                  | 0.003                       |
| CDCC                                 | DDDDC           | OAPE    |                          |                             |                     |                             | 68                  | 0.007                       | 127                 | 0.013                       |
| CDCC                                 | DDDDDC          | OUPPE   |                          |                             |                     |                             | 72                  | 0.007                       | 133                 | 0.014                       |
| <b>Total:</b>                        |                 |         | <b>559</b>               | <b>0.056</b>                | <b>2373</b>         | <b>0.254</b>                | <b>1093</b>         | <b>0.110</b>                | <b>2017</b>         | <b>0.213</b>                |
| <b>Sphingomyelin - SM</b>            |                 |         | <i>outer/inner ratio</i> |                             | <b>0.69</b>         | <b>0.31</b>                 |                     | <b>0.80</b>                 |                     | <b>0.20</b>                 |
| TCC                                  | CCCC            | DPSM    | 611                      | 0.062                       | 279                 | 0.030                       | 581                 | 0.058                       | 143                 | 0.015                       |
| TCCC                                 | CCCCC           | DBSM    | 133                      | 0.013                       | 61                  | 0.007                       |                     |                             |                     |                             |
| TCCCC                                | CCCCCC          | DXSM    | 247                      | 0.025                       | 113                 | 0.012                       |                     |                             |                     |                             |
| TCC                                  | CDCC            | POSM    | 38                       | 0.004                       | 17                  | 0.002                       | 71                  | 0.007                       | 17                  | 0.002                       |
| TCC                                  | CCDCC           | PGSM    | 38                       | 0.004                       | 17                  | 0.002                       |                     |                             |                     |                             |
| TCC                                  | CCCDCC          | PNSM    | 381                      | 0.038                       | 174                 | 0.019                       | 132                 | 0.013                       | 32                  | 0.003                       |
| TCC                                  | CCCCC           | PBSM    |                          |                             |                     |                             | 108                 | 0.011                       | 27                  | 0.003                       |
| TCCC                                 | CCCDCC          | BNSM    | 191                      | 0.019                       | 86                  | 0.009                       |                     |                             |                     |                             |
| TCCCC                                | CCCDCC          | XNSM    | 267                      | 0.027                       | 121                 | 0.013                       |                     |                             |                     |                             |
| <b>Total:</b>                        |                 |         | <b>1906</b>              | <b>0.192</b>                | <b>868</b>          | <b>0.093</b>                | <b>892</b>          | <b>0.089</b>                | <b>219</b>          | <b>0.023</b>                |
| <b>Phosphatidylserine - PS</b>       |                 |         | <i>outer/inner ratio</i> |                             | <b>0.00</b>         | <b>1.00</b>                 |                     |                             | <b>0.00</b>         | <b>1.00</b>                 |
| CCCC                                 | CCCC            | DPPS    |                          |                             |                     |                             |                     |                             | 46                  | 0.005                       |
| CCCC                                 | CDCC            | POPS    |                          |                             | 200                 | 0.021                       |                     |                             | 232                 | 0.025                       |

|                                               |        |      |                          |             |             |     |             |             |
|-----------------------------------------------|--------|------|--------------------------|-------------|-------------|-----|-------------|-------------|
| CCCC                                          | CDDC   | PIPS |                          | 79          | 0.008       |     |             |             |
| CCCC                                          | CDDDC  | PQPS |                          | 39          | 0.004       |     |             |             |
| CCCC                                          | DDDDC  | PAPS |                          | 461         | 0.049       |     | 261         | 0.028       |
| DDDDC                                         | DDDDC  | DAPS |                          | 20          | 0.002       |     |             |             |
| CCCC                                          | DDDDDC | PUPS |                          | 180         | 0.019       |     | 326         | 0.034       |
| DDDDDC                                        | DDDDDC | DUPS |                          | 20          | 0.002       |     |             |             |
| CDCC                                          | DDDDDC | OUPS |                          |             |             |     | 65          | 0.007       |
| <b>Total:</b>                                 |        |      |                          | 999         | 0.107       |     | 930         | 0.098       |
| <b>Glycolipid - GM1</b>                       |        |      | <i>outer/inner ratio</i> | <b>1.00</b> | <b>0.00</b> |     | <b>1.00</b> | <b>0.00</b> |
| TCC                                           | CCCC   | DPG1 | 89                       | 0.009       |             | 89  | 0.009       |             |
| TCCC                                          | CCCCC  | DBG1 |                          |             |             | 16  | 0.002       |             |
| TCCCC                                         | CCCCCC | DXG1 | 51                       | 0.005       |             |     |             |             |
| TCC                                           | CDCC   | POG1 |                          |             |             | 10  | 0.001       |             |
| TCC                                           | CCCDCC | PNG1 | 64                       | 0.006       |             | 20  | 0.002       |             |
| TCCCC                                         | CCCDCC | XNG1 | 51                       | 0.005       |             |     |             |             |
| <b>Total:</b>                                 |        |      | 255                      | 0.026       |             | 135 | 0.014       |             |
| <b>Glycolipid - GM3</b>                       |        |      | <i>outer/inner ratio</i> | <b>1.00</b> | <b>0.00</b> |     | <b>1.00</b> | <b>0.00</b> |
| TCC                                           | CCCC   | DPG3 | 89                       | 0.009       |             | 89  | 0.009       |             |
| TCCC                                          | CCCCC  | DBG3 |                          |             |             | 16  | 0.002       |             |
| TCCCC                                         | CCCCCC | DXG3 | 51                       | 0.005       |             |     |             |             |
| TCC                                           | CDCC   | POG3 |                          |             |             | 10  | 0.001       |             |
| TCC                                           | CCCDCC | PNG3 | 64                       | 0.006       |             | 20  | 0.002       |             |
| TCCCC                                         | CCCDCC | XNG3 | 51                       | 0.005       |             |     |             |             |
| <b>Total:</b>                                 |        |      | 255                      | 0.026       |             | 135 | 0.014       |             |
| <b>Cerebrosides</b>                           |        |      | <i>outer/inner ratio</i> |             |             |     | <b>1.00</b> | <b>0.00</b> |
| TCC                                           | CCCC   | DPGS |                          |             |             | 484 | 0.049       |             |
| TCCC                                          | CCCCC  | DBGS |                          |             |             | 90  | 0.009       |             |
| TCC                                           | CDCC   | POGS |                          |             |             | 59  | 0.006       |             |
| TCC                                           | CCCDCC | PNGS |                          |             |             | 109 | 0.011       |             |
| <b>Total:</b>                                 |        |      |                          |             |             | 742 | 0.074       |             |
| <b>Phosphatidylinositol - PI</b>              |        |      | <i>outer/inner ratio</i> | <b>0.00</b> | <b>1.00</b> |     | <b>0.00</b> | <b>1.00</b> |
| CCCC                                          | CDCC   | POPI |                          | 137         | 0.015       |     | 121         | 0.013       |
| CCCC                                          | CDDC   | PIPI |                          | 120         | 0.013       |     | 48          | 0.005       |
| CCCC                                          | DDDDC  | PAPI |                          | 120         | 0.013       |     | 121         | 0.013       |
| CCCC                                          | DDDDDC | PUPI |                          | 51          | 0.005       |     | 194         | 0.020       |
| <b>Total:</b>                                 |        |      |                          | 428         | 0.046       |     | 484         | 0.051       |
| <b>Phosphatidic acid - PA</b>                 |        |      | <i>outer/inner ratio</i> | <b>0.00</b> | <b>1.00</b> |     | <b>0.00</b> | <b>1.00</b> |
| CCCC                                          | CDCC   | POPA |                          | 46          | 0.005       |     | 13          | 0.001       |
| CCCC                                          | CDDC   | PIPA |                          | 39          | 0.004       |     |             |             |
| CCCC                                          | DDDDC  | PAPA |                          | 39          | 0.004       |     | 25          | 0.003       |
| CCCC                                          | DDDDDC | PUPA |                          | 17          | 0.002       |     |             |             |
| <b>Total:</b>                                 |        |      |                          | 141         | 0.015       |     | 38          | 0.004       |
| <b>Phosphatidylinositol phosphates - PIPs</b> |        |      | <i>outer/inner ratio</i> | <b>0.00</b> | <b>1.00</b> |     | <b>0.00</b> | <b>1.00</b> |
| CCCC                                          | CDCC   | POP1 |                          | 48          | 0.005       |     | 15          | 0.002       |
| CCCC                                          | DDDDC  | PAP1 |                          |             |             |     | 29          | 0.003       |
| CCCC                                          | CDCC   | POP2 |                          | 48          | 0.005       |     | 15          | 0.002       |
| CCCC                                          | DDDDC  | PAP2 |                          |             |             |     | 29          | 0.003       |
| CCCC                                          | CDCC   | POP3 |                          | 48          | 0.005       |     | 15          | 0.002       |
| CCCC                                          | DDDDC  | PAP3 |                          |             |             |     | 29          | 0.003       |
| <b>Total:</b>                                 |        |      |                          | 144         | 0.015       |     | 132         | 0.014       |
| <b>Ceramide - CER</b>                         |        |      | <i>outer/inner ratio</i> | <b>0.65</b> | <b>0.35</b> |     | <b>0.50</b> | <b>0.50</b> |

|                                           |        |               |                          |       |             |             |      |       |             |             |
|-------------------------------------------|--------|---------------|--------------------------|-------|-------------|-------------|------|-------|-------------|-------------|
| TCC                                       | CCCC   | DPCE          | 30                       | 0.003 | 16          | 0.002       | 38   | 0.004 | 37          | 0.004       |
| TCCC                                      | CCCCC  | DBCE          |                          |       |             |             | 6    | 0.001 | 6           | 0.001       |
| TCCCC                                     | CCCCCC | DXCE          | 17                       | 0.002 | 9           | 0.001       |      |       |             |             |
| TCC                                       | CCCDCC | FNCE          | 20                       | 0.002 | 12          | 0.001       | 8    | 0.001 | 8           | 0.001       |
| TCC                                       | CDCC   | POCE          |                          |       |             |             | 4    | 0.000 | 4           | 0.000       |
| TCCCC                                     | CCCDCC | XNCE          | 17                       | 0.002 | 9           | 0.001       |      |       |             |             |
|                                           |        | <b>Total:</b> | 84                       | 0.008 | 46          | 0.005       | 56   | 0.006 | 55          | 0.006       |
| <b>Lysophosphatidylcholine - LPC</b>      |        |               | <i>outer/inner ratio</i> |       | <b>1.00</b> | <b>0.00</b> |      |       | <b>0.67</b> | <b>0.33</b> |
| CCCC                                      |        | PPC           | 64                       | 0.006 |             |             | 20   | 0.002 | 10          | 0.001       |
| CDCC                                      |        | OPC           | 20                       | 0.002 |             |             |      |       |             |             |
| CDDC                                      |        | IPC           | 18                       | 0.002 |             |             | 10   | 0.001 | 5           | 0.001       |
| DDDDC                                     |        | APC           | 18                       | 0.002 |             |             |      |       |             |             |
| DDDDDC                                    |        | UPC           | 7                        | 0.001 |             |             |      |       |             |             |
|                                           |        | <b>Total:</b> | 127                      | 0.013 |             |             | 30   | 0.003 | 15          | 0.002       |
| <b>Lysophosphatidylethanolamine – LPE</b> |        |               | <i>outer/inner ratio</i> |       |             |             |      |       | <b>0.33</b> | <b>0.67</b> |
| CCCC                                      |        | PPE           |                          |       |             |             | 5    | 0.001 | 10          | 0.001       |
| CDDC                                      |        | IPE           |                          |       |             |             | 10   | 0.001 | 20          | 0.002       |
|                                           |        | <b>Total:</b> |                          |       |             |             | 15   | 0.002 | 30          | 0.003       |
| <b>Diacylglycerol - DAG</b>               |        |               | <i>outer/inner ratio</i> |       | <b>0.60</b> | <b>0.40</b> |      |       | <b>0.50</b> | <b>0.50</b> |
| CCCC                                      | CDCC   | PODG          | 25                       | 0.003 | 17          | 0.002       | 13   | 0.001 | 13          | 0.001       |
| CCCC                                      | CDDC   | PIDG          | 23                       | 0.002 | 15          | 0.002       |      |       |             |             |
| CCCC                                      | DDDDC  | PADG          | 23                       | 0.002 | 15          | 0.002       | 25   | 0.003 | 25          | 0.003       |
| CCCC                                      | DDDDDC | PUDG          | 9                        | 0.001 | 6           | 0.001       |      |       |             |             |
|                                           |        | <b>Total:</b> | 80                       | 0.008 | 53          | 0.006       | 38   | 0.004 | 38          | 0.004       |
| <b>Cholesterol - CHOL</b>                 |        |               | <i>outer/inner ratio</i> |       | <b>0.54</b> | <b>0.46</b> |      |       | <b>0.51</b> | <b>0.49</b> |
|                                           |        | CHOL          | 3104                     | 0.313 | 2656        | 0.285       | 4431 | 0.444 | 4222        | 0.446       |
| <b>Total all lipids</b>                   |        |               | 9913                     | 1.000 | 9326        | 1.000       | 9979 | 1.000 | 9468        | 1.000       |

<sup>a</sup>Relative abundance of the different lipid species in the plasma membrane leaflets as well as the ratio between the leaflets. On the microsecond time scale lipids with a “proper” hydrated headgroups do not flip-flop between the leaflets and their number in each leaflet is constant. In contrast cholesterol (CHOL), ceramides (CER) and diacylglycerols (DAG) do flip-flop; therefore, their average numbers fluctuate somewhat over the simulations. The numbers reported here are initial values. Averaged over the last 10  $\mu$ s of the simulations the total outer/inner leaflet counts are: CHOL 3152/2608, CER 83/47, DAG 83/50 in the **Average** and CHOL 4412/4241, CER 53/58, DAG 29/47 in the **Brain**. The Martini beads for each lipid tail are listed: C beads represent a saturated carbon chain, D beads have 1-2 cis double bonds, and T beads are below the AM1 sphingosine linker with the trans double bound. Note, the Martini O tail (representing oleic acid or palmitoleic acid) used to be CCDC but now is CDCC. The old arrangement is used in the **Average** mixture for consistency with (1).

Table S2 Lipid average order parameter<sup>a</sup>

| Lipid tail sn-1                      | Lipid tail sn-2 | Acronym | Average             |                 |                 |                     |                 |                 | Brain               |                 |                 |                     |                 |                 |       |
|--------------------------------------|-----------------|---------|---------------------|-----------------|-----------------|---------------------|-----------------|-----------------|---------------------|-----------------|-----------------|---------------------|-----------------|-----------------|-------|
|                                      |                 |         | Inner leaflet count | Inner tail sn-1 | Inner tail sn-2 | Outer leaflet count | Outer tail sn-1 | Outer tail sn-2 | Inner leaflet count | Inner tail sn-1 | Inner tail sn-2 | Outer leaflet count | Outer tail sn-1 | Outer tail sn-2 |       |
| <b>Phosphatidylcholine - PC</b>      |                 |         |                     |                 |                 |                     |                 |                 |                     |                 |                 |                     |                 |                 |       |
| CCCC                                 | CCCC            | DPPC    |                     |                 |                 |                     |                 |                 |                     | 284             | 0.482           | 0.506               | 531             | 0.536           | 0.553 |
| CCCC                                 | CDCC            | POPC    | 550                 | 0.475           | 0.440           | 1205                | 0.478           | 0.444           | 463                 | 0.458           | 0.408           | 868                 | 0.511           | 0.447           |       |
| CDCC                                 | CDCC            | DOPC    | 49                  | 0.417           | 0.434           | 106                 | 0.415           | 0.434           | 118                 | 0.371           | 0.395           | 221                 | 0.412           | 0.429           |       |
| CCCC                                 | CDDC            | PIPC    | 810                 | 0.459           | 0.260           | 1772                | 0.458           | 0.253           |                     |                 |                 |                     |                 |                 |       |
| CCCC                                 | CDDD            | PFPC    |                     |                 |                 |                     |                 |                 | 32                  | 0.459           | 0.183           | 59                  | 0.499           | 0.167           |       |
| CCCC                                 | CDDCC           | PEPC    | 32                  | 0.463           | 0.283           | 71                  | 0.458           | 0.274           |                     |                 |                 |                     |                 |                 |       |
| CCCC                                 | DDDDC           | PAPC    | 129                 | 0.455           | 0.131           | 283                 | 0.454           | 0.119           | 247                 | 0.448           | 0.139           | 463                 | 0.497           | 0.136           |       |
| DDDDC                                | DDDDC           | DAPC    | 16                  | 0.123           | 0.153           | 35                  | 0.108           | 0.137           |                     |                 |                 |                     |                 |                 |       |
| CCCC                                 | DDDDDC          | PUPC    | 32                  | 0.455           | 0.112           | 71                  | 0.444           | 0.103           | 90                  | 0.456           | 0.076           | 169                 | 0.495           | 0.063           |       |
| CDCC                                 | CDDC            | OIPC    |                     |                 |                 |                     |                 |                 | 32                  | 0.368           | 0.269           | 59                  | 0.407           | 0.272           |       |
| CDCC                                 | DDDDDC          | OUPC    |                     |                 |                 |                     |                 |                 | 22                  | 0.370           | 0.075           | 42                  | 0.398           | 0.058           |       |
| <b>Phosphatidylethanolamine - PE</b> |                 |         |                     |                 |                 |                     |                 |                 |                     |                 |                 |                     |                 |                 |       |
| CCCC                                 | CCDC            | POPE    | 569                 | 0.471           | 0.439           | 135                 | 0.471           | 0.441           | 234                 | 0.448           | 0.403           | 127                 | 0.505           | 0.445           |       |
| CDCC                                 | CDCC            | DOPE    | 190                 | 0.412           | 0.431           | 44                  | 0.415           | 0.434           |                     |                 |                 |                     |                 |                 |       |
| CCCC                                 | CDDC            | PIPE    | 380                 | 0.452           | 0.267           | 90                  | 0.454           | 0.261           |                     |                 |                 |                     |                 |                 |       |
| CCCC                                 | CDDDC           | PQPE    | 95                  | 0.446           | 0.209           | 22                  | 0.458           | 0.213           |                     |                 |                 |                     |                 |                 |       |
| CCCC                                 | DDDDC           | PAPE    | 522                 | 0.449           | 0.130           | 124                 | 0.446           | 0.121           | 574                 | 0.442           | 0.136           | 312                 | 0.491           | 0.135           |       |
| DDDDC                                | DDDDC           | DAPE    | 332                 | 0.123           | 0.150           | 78                  | 0.110           | 0.138           |                     |                 |                 |                     |                 |                 |       |
| CCCC                                 | DDDDDC          | PUPE    | 190                 | 0.445           | 0.110           | 44                  | 0.442           | 0.104           | 922                 | 0.443           | 0.075           | 500                 | 0.490           | 0.063           |       |
| DDDDDC                               | DDDDDC          | DUPE    | 95                  | 0.105           | 0.127           | 22                  | 0.091           | 0.117           |                     |                 |                 |                     |                 |                 |       |
| CDCC                                 | CDDC            | OIPE    |                     |                 |                 |                     |                 |                 | 27                  | 0.369           | 0.271           | 14                  | 0.401           | 0.277           |       |
| CDCC                                 | DDDDC           | OAPE    |                     |                 |                 |                     |                 |                 | 127                 | 0.359           | 0.133           | 68                  | 0.394           | 0.132           |       |
| CDCC                                 | DDDDDC          | OUPE    |                     |                 |                 |                     |                 |                 | 133                 | 0.362           | 0.075           | 72                  | 0.393           | 0.066           |       |
| <b>Sphingomyelin - SM</b>            |                 |         |                     |                 |                 |                     |                 |                 |                     |                 |                 |                     |                 |                 |       |
| TCC                                  | CCCC            | DPSM    | 279                 | 0.522           | 0.552           | 611                 | 0.529           | 0.564           | 143                 | 0.515           | 0.574           | 581                 | 0.565           | 0.611           |       |
| TCCC                                 | CCCCC           | DBSM    | 61                  | 0.464           | 0.536           | 133                 | 0.470           | 0.545           |                     |                 |                 |                     |                 |                 |       |
| TCCCC                                | CCCCC           | DXSM    | 113                 | 0.393           | 0.483           | 247                 | 0.397           | 0.490           |                     |                 |                 |                     |                 |                 |       |
| TCC                                  | CDCC            | POSM    | 17                  | 0.451           | 0.544           | 38                  | 0.453           | 0.547           | 17                  | 0.426           | 0.555           | 71                  | 0.457           | 0.581           |       |
| TCC                                  | CCDCC           | PGSM    | 17                  | 0.390           | 0.533           | 38                  | 0.404           | 0.557           |                     |                 |                 |                     |                 |                 |       |
| TCC                                  | CCCDCC          | PNSM    | 174                 | 0.355           | 0.553           | 381                 | 0.358           | 0.559           | 32                  | 0.341           | 0.571           | 132                 | 0.385           | 0.605           |       |
| TCC                                  | CCCCC           | PBSM    |                     |                 |                 |                     |                 |                 | 27                  | 0.443           | 0.576           | 108                 | 0.497           | 0.610           |       |
| TCCC                                 | CCCDCC          | BNSM    | 86                  | 0.354           | 0.530           | 191                 | 0.357           | 0.536           |                     |                 |                 |                     |                 |                 |       |
| TCCCC                                | CCCDCC          | XNSM    | 121                 | 0.360           | 0.478           | 267                 | 0.363           | 0.483           |                     |                 |                 |                     |                 |                 |       |
| <b>Phosphatidylserine - PS</b>       |                 |         |                     |                 |                 |                     |                 |                 |                     |                 |                 |                     |                 |                 |       |
| CCCC                                 | CCCC            | DPPS    |                     |                 |                 |                     |                 |                 | 46                  | 0.488           | 0.507           |                     |                 |                 |       |
| CCCC                                 | CDCC            | POPS    | 200                 | 0.474           | 0.442           |                     |                 |                 | 232                 | 0.458           | 0.410           |                     |                 |                 |       |
| CCCC                                 | CDDC            | PIPS    | 79                  | 0.461           | 0.265           |                     |                 |                 |                     |                 |                 |                     |                 |                 |       |
| CCCC                                 | CDDDC           | PQPS    | 39                  | 0.462           | 0.214           |                     |                 |                 |                     |                 |                 |                     |                 |                 |       |
| CCCC                                 | DDDDC           | PAPS    | 461                 | 0.455           | 0.133           |                     |                 |                 | 261                 | 0.451           | 0.140           |                     |                 |                 |       |



|                                           |        |      |    |       |       |    |       |       |    |       |       |    |       |       |
|-------------------------------------------|--------|------|----|-------|-------|----|-------|-------|----|-------|-------|----|-------|-------|
| DDDDC                                     | APC    |      |    |       |       | 18 | 0.150 |       |    |       |       |    |       |       |
| DDDDDC                                    | UPC    |      |    |       |       | 7  | 0.121 |       |    |       |       |    |       |       |
| <b>Lysophosphatidylethanolamine – LPE</b> |        |      |    |       |       |    |       |       |    |       |       |    |       |       |
| CCCC                                      | PPE    |      |    |       |       |    |       |       | 10 | 0.487 |       | 5  | 0.544 |       |
| CDDC                                      | IPE    |      |    |       |       |    |       |       | 20 | 0.289 |       | 10 | 0.304 |       |
| <b>Diacylglycerol - DAG</b>               |        |      |    |       |       |    |       |       |    |       |       |    |       |       |
| CCCC                                      | CDCC   | PODG | 17 | 0.435 | 0.390 | 25 | 0.435 | 0.390 | 13 | 0.456 | 0.385 | 13 | 0.456 | 0.385 |
| CCCC                                      | CDDC   | PIDG | 15 | 0.412 | 0.215 | 23 | 0.412 | 0.215 |    |       |       |    |       |       |
| CCCC                                      | DDDDC  | PADG | 15 | 0.401 | 0.091 | 23 | 0.401 | 0.091 | 25 | 0.438 | 0.105 | 25 | 0.438 | 0.105 |
| CCCC                                      | DDDDDC | PUDG | 6  | 0.414 | 0.073 | 9  | 0.414 | 0.073 |    |       |       |    |       |       |

<sup>a</sup>Lipid tail order parameters ( $S$ ) were calculated for each lipid type as explained in the SI methods. Here we show the absolute average order parameter per tail in each leaflet. <sup>b</sup>DAG and CER lipids flip-flop between the leaflets, therefore, their tail order was determined jointly in both leaflets. Standard errors were calculated using block averaging; they were typically  $\sim 0.003$  and all were less than 0.015, therefore, skipped for brevity. The weighted average tail order over all lipid types (excluding lipids that flip-flop) are: **Average** [0.435,0.374] / [0.430,0.301] and **Brain** [0.487,0.391] / [0.444,0.224], respectively for the [sn-1, sn-2] tails in the outer/inner leaflet.



Table S3 Lipid diffusion rates<sup>a</sup>

| Acronym                              | Average             |                                                     |                                                      |                     |                                                     |                                                      | Brain               |                                                     |                                                      |                     |                                                     |                                                      |
|--------------------------------------|---------------------|-----------------------------------------------------|------------------------------------------------------|---------------------|-----------------------------------------------------|------------------------------------------------------|---------------------|-----------------------------------------------------|------------------------------------------------------|---------------------|-----------------------------------------------------|------------------------------------------------------|
|                                      | Outer leaflet count | Outer diffusion avg. / $10^{-7}$ cm <sup>2</sup> /s | Outer diffusion error / $10^{-7}$ cm <sup>2</sup> /s | Inner leaflet count | Inner diffusion avg. / $10^{-7}$ cm <sup>2</sup> /s | Inner diffusion error / $10^{-7}$ cm <sup>2</sup> /s | Outer leaflet count | Outer diffusion avg. / $10^{-7}$ cm <sup>2</sup> /s | Outer diffusion error / $10^{-7}$ cm <sup>2</sup> /s | Inner leaflet count | Inner diffusion avg. / $10^{-7}$ cm <sup>2</sup> /s | Inner diffusion error / $10^{-7}$ cm <sup>2</sup> /s |
| <b>Phosphatidylcholine - PC</b>      |                     |                                                     |                                                      |                     |                                                     |                                                      |                     |                                                     |                                                      |                     |                                                     |                                                      |
| DPPC                                 |                     |                                                     |                                                      |                     |                                                     |                                                      | 531                 | 1.48                                                | 0.27                                                 | 284                 | 2.59                                                | 0.15                                                 |
| POPC                                 | 1205                | 3.41                                                | 0.24                                                 | 550                 | 4.42                                                | 0.25                                                 | 868                 | 1.76                                                | 0.07                                                 | 463                 | 2.96                                                | 0.17                                                 |
| DOPC                                 | 106                 | 3.46                                                | 0.43                                                 | 49                  | 3.62                                                | 0.16                                                 | 221                 | 1.79                                                | 0.17                                                 | 118                 | 2.61                                                | 0.22                                                 |
| PIPC                                 | 1772                | 3.63                                                | 0.23                                                 | 810                 | 4.58                                                | 0.11                                                 |                     |                                                     |                                                      |                     |                                                     |                                                      |
| PFPC                                 |                     |                                                     |                                                      |                     |                                                     |                                                      | 59                  | 2.26                                                | 0.19                                                 | 32                  | 3.53                                                | 0.06                                                 |
| PEPC                                 | 71                  | 2.89                                                | 0.69                                                 | 32                  | 4.31                                                | 0.96                                                 |                     |                                                     |                                                      |                     |                                                     |                                                      |
| PAPC                                 | 283                 | 3.21                                                | 0.11                                                 | 129                 | 5.25                                                | 0.34                                                 | 463                 | 1.98                                                | 0.17                                                 | 247                 | 2.65                                                | 0.41                                                 |
| DAPC                                 | 35                  | 3.06                                                | 0.21                                                 | 16                  | 4.44                                                | 2.60                                                 |                     |                                                     |                                                      |                     |                                                     |                                                      |
| PUPC                                 | 71                  | 3.22                                                | 0.79                                                 | 32                  | 3.93                                                | 0.25                                                 | 169                 | 2.27                                                | 0.06                                                 | 90                  | 3.02                                                | 0.62                                                 |
| OIPC                                 |                     |                                                     |                                                      |                     |                                                     |                                                      | 59                  | 1.81                                                | 0.01                                                 | 32                  | 2.42                                                | 0.14                                                 |
| OUPC                                 |                     |                                                     |                                                      |                     |                                                     |                                                      | 42                  | 2.31                                                | 0.44                                                 | 22                  | 1.98                                                | 1.67                                                 |
| <b>Phosphatidylethanolamine - PE</b> |                     |                                                     |                                                      |                     |                                                     |                                                      |                     |                                                     |                                                      |                     |                                                     |                                                      |
| POPE                                 | 135                 | 2.64                                                | 0.25                                                 | 569                 | 4.05                                                | 0.02                                                 | 127                 | 1.54                                                | 0.18                                                 | 234                 | 2.31                                                | 0.02                                                 |
| DOPE                                 | 44                  | 2.80                                                | 0.67                                                 | 190                 | 4.10                                                | 0.48                                                 |                     |                                                     |                                                      |                     |                                                     |                                                      |
| PIPE                                 | 90                  | 3.35                                                | 0.19                                                 | 380                 | 4.20                                                | 0.16                                                 |                     |                                                     |                                                      |                     |                                                     |                                                      |
| PQPE                                 | 22                  | 2.70                                                | 0.46                                                 | 95                  | 4.60                                                | 0.57                                                 |                     |                                                     |                                                      |                     |                                                     |                                                      |
| PAPE                                 | 124                 | 3.24                                                | 0.06                                                 | 522                 | 4.42                                                | 0.21                                                 | 312                 | 1.96                                                | 0.23                                                 | 574                 | 2.97                                                | 0.01                                                 |
| DAPE                                 | 78                  | 3.74                                                | 0.07                                                 | 332                 | 5.02                                                | 0.03                                                 |                     |                                                     |                                                      |                     |                                                     |                                                      |
| PUPE                                 | 44                  | 3.83                                                | 0.68                                                 | 190                 | 4.57                                                | 0.73                                                 | 500                 | 1.88                                                | 0.11                                                 | 922                 | 2.80                                                | 0.04                                                 |
| DUPE                                 | 22                  | 4.35                                                | 0.98                                                 | 95                  | 4.39                                                | 0.24                                                 |                     |                                                     |                                                      |                     |                                                     |                                                      |
| OIPE                                 |                     |                                                     |                                                      |                     |                                                     |                                                      | 14                  | 1.40                                                | 0.10                                                 | 27                  | 2.74                                                | 0.55                                                 |
| OAPE                                 |                     |                                                     |                                                      |                     |                                                     |                                                      | 68                  | 2.39                                                | 0.01                                                 | 127                 | 2.81                                                | 0.25                                                 |
| OUPE                                 |                     |                                                     |                                                      |                     |                                                     |                                                      | 72                  | 2.25                                                | 0.53                                                 | 133                 | 3.34                                                | 0.04                                                 |
| <b>Sphingomyelin - SM</b>            |                     |                                                     |                                                      |                     |                                                     |                                                      |                     |                                                     |                                                      |                     |                                                     |                                                      |
| DPSM                                 | 611                 | 3.33                                                | 0.18                                                 | 279                 | 4.24                                                | 0.59                                                 | 581                 | 1.62                                                | 0.02                                                 | 143                 | 2.48                                                | 0.04                                                 |
| DBSM                                 | 133                 | 2.33                                                | 0.54                                                 | 61                  | 4.42                                                | 0.97                                                 |                     |                                                     |                                                      |                     |                                                     |                                                      |
| DXSM                                 | 247                 | 2.44                                                | 0.11                                                 | 113                 | 3.62                                                | 0.17                                                 |                     |                                                     |                                                      |                     |                                                     |                                                      |
| POSM                                 | 38                  | 3.80                                                | 0.99                                                 | 17                  | 2.49                                                | 0.27                                                 | 71                  | 1.61                                                | 0.12                                                 | 17                  | 1.88                                                | 0.80                                                 |
| PGSM                                 | 38                  | 3.81                                                | 0.60                                                 | 17                  | 6.94                                                | 2.31                                                 |                     |                                                     |                                                      |                     |                                                     |                                                      |
| PNSM                                 | 381                 | 2.92                                                | 0.05                                                 | 174                 | 3.81                                                | 0.09                                                 | 132                 | 1.53                                                | 0.04                                                 | 32                  | 2.19                                                | 0.35                                                 |
| PBSM                                 |                     |                                                     |                                                      |                     |                                                     |                                                      | 108                 | 1.53                                                | 0.66                                                 | 27                  | 1.32                                                | 0.89                                                 |
| BNSM                                 | 191                 | 2.83                                                | 0.08                                                 | 86                  | 4.03                                                | 0.62                                                 |                     |                                                     |                                                      |                     |                                                     |                                                      |
| XNSM                                 | 267                 | 2.98                                                | 0.16                                                 | 121                 | 3.73                                                | 0.03                                                 |                     |                                                     |                                                      |                     |                                                     |                                                      |
| <b>Phosphatidylserine - PS</b>       |                     |                                                     |                                                      |                     |                                                     |                                                      |                     |                                                     |                                                      |                     |                                                     |                                                      |
| DPPS                                 |                     |                                                     |                                                      |                     |                                                     |                                                      |                     |                                                     |                                                      | 46                  | 2.44                                                | 0.26                                                 |
| POPS                                 |                     |                                                     |                                                      | 200                 | 4.47                                                | 0.12                                                 |                     |                                                     |                                                      | 232                 | 2.76                                                | 0.09                                                 |
| PIPS                                 |                     |                                                     |                                                      | 79                  | 5.13                                                | 0.54                                                 |                     |                                                     |                                                      |                     |                                                     |                                                      |
| PQPS                                 |                     |                                                     |                                                      | 39                  | 4.06                                                | 0.23                                                 |                     |                                                     |                                                      |                     |                                                     |                                                      |
| PAPS                                 |                     |                                                     |                                                      | 461                 | 4.53                                                | 0.33                                                 |                     |                                                     |                                                      | 261                 | 3.19                                                | 0.13                                                 |

|                                               |    |      |      |     |      |      |     |      |      |      |      |      |
|-----------------------------------------------|----|------|------|-----|------|------|-----|------|------|------|------|------|
| DAPS                                          |    |      |      | 20  | 3.74 | 0.23 |     |      |      |      |      |      |
| PUPS                                          |    |      |      | 180 | 4.21 | 0.53 |     | 326  | 2.98 | 0.06 |      |      |
| DUPS                                          |    |      |      | 20  | 2.62 | 0.14 |     |      |      |      |      |      |
| OUPS                                          |    |      |      |     |      |      |     | 65   | 2.87 | 0.09 |      |      |
| <b>Glycolipid - GM1</b>                       |    |      |      |     |      |      |     |      |      |      |      |      |
| DPG1                                          | 89 | 1.34 | 0.27 |     |      |      | 89  | 0.74 | 0.05 |      |      |      |
| DBG1                                          |    |      |      |     |      |      | 16  | 0.49 | 0.19 |      |      |      |
| DXG1                                          | 51 | 1.10 | 0.20 |     |      |      |     |      |      |      |      |      |
| POG1                                          |    |      |      |     |      |      | 10  | 0.78 | 0.12 |      |      |      |
| PNG1                                          | 64 | 1.11 | 0.45 |     |      |      | 20  | 0.81 | 0.35 |      |      |      |
| XNG1                                          | 51 | 1.04 | 0.22 |     |      |      |     |      |      |      |      |      |
| <b>Glycolipid - GM3</b>                       |    |      |      |     |      |      |     |      |      |      |      |      |
| DPG3                                          | 89 | 1.86 | 0.74 |     |      |      | 89  | 0.88 | 0.06 |      |      |      |
| DBG3                                          |    |      |      |     |      |      | 16  | 0.56 | 0.02 |      |      |      |
| DXG3                                          | 51 | 1.45 | 0.05 |     |      |      |     |      |      |      |      |      |
| POG3                                          |    |      |      |     |      |      | 10  | 0.42 | 0.38 |      |      |      |
| PNG3                                          | 64 | 2.10 | 0.70 |     |      |      | 20  | 1.20 | 0.46 |      |      |      |
| XNG3                                          | 51 | 2.04 | 0.85 |     |      |      |     |      |      |      |      |      |
| <b>Cerebrosides</b>                           |    |      |      |     |      |      |     |      |      |      |      |      |
| DPGS                                          |    |      |      |     |      |      | 484 | 0.98 | 0.13 |      |      |      |
| DBGS                                          |    |      |      |     |      |      | 90  | 0.94 | 0.28 |      |      |      |
| POGS                                          |    |      |      |     |      |      | 59  | 0.79 | 0.35 |      |      |      |
| PNGS                                          |    |      |      |     |      |      | 109 | 1.06 | 0.01 |      |      |      |
| <b>Phosphatidylinositol - PI</b>              |    |      |      |     |      |      |     |      |      |      |      |      |
| POPI                                          |    |      |      | 137 | 4.40 | 0.29 |     | 121  | 2.59 | 0.08 |      |      |
| PIPI                                          |    |      |      | 120 | 4.54 | 0.65 |     | 48   | 3.34 | 0.82 |      |      |
| PAPI                                          |    |      |      | 120 | 5.08 | 0.28 |     | 121  | 2.98 | 0.09 |      |      |
| PUPI                                          |    |      |      | 51  | 4.08 | 1.37 |     | 194  | 2.80 | 0.74 |      |      |
| <b>Phosphatidic acid - PA</b>                 |    |      |      |     |      |      |     |      |      |      |      |      |
| POPA                                          |    |      |      | 46  | 4.06 | 0.35 |     | 13   | 2.65 | 1.18 |      |      |
| PIPA                                          |    |      |      | 39  | 3.93 | 0.39 |     |      |      |      |      |      |
| PAPA                                          |    |      |      | 39  | 2.97 | 0.51 |     | 25   | 1.75 | 1.84 |      |      |
| PUPA                                          |    |      |      | 17  | 3.27 | 2.06 |     |      |      |      |      |      |
| <b>Phosphatidylinositol phosphates - PIPs</b> |    |      |      |     |      |      |     |      |      |      |      |      |
| POP1                                          |    |      |      | 48  | 3.82 | 0.09 |     | 15   | 2.52 | 0.73 |      |      |
| PAP1                                          |    |      |      |     |      |      |     | 29   | 2.95 | 0.66 |      |      |
| POP2                                          |    |      |      | 48  | 4.26 | 0.31 |     | 15   | 2.09 | 0.02 |      |      |
| PAP2                                          |    |      |      |     |      |      |     | 29   | 2.00 | 0.17 |      |      |
| POP3                                          |    |      |      | 48  | 3.36 | 0.64 |     | 15   | 1.67 | 0.50 |      |      |
| PAP3                                          |    |      |      |     |      |      |     | 29   | 2.56 | 0.29 |      |      |
| <b>Ceramide - CER<sup>b</sup></b>             |    |      |      |     |      |      |     |      |      |      |      |      |
| DPCE                                          | 30 | 5.78 | 1.47 | 16  | 5.78 | 1.47 | 38  | 2.35 | 0.16 | 37   | 2.35 | 0.16 |
| DBCE                                          |    |      |      |     |      |      | 6   | 2.06 | 0.77 | 6    | 2.06 | 0.77 |
| DXCE                                          | 17 | 4.13 | 0.50 | 9   | 4.13 | 0.50 |     |      |      |      |      |      |
| PNCE                                          | 20 | 4.44 | 1.24 | 12  | 4.44 | 1.24 | 8   | 1.69 | 0.35 | 8    | 1.69 | 0.35 |
| POCE                                          |    |      |      |     |      |      | 4   | 4.63 | 1.15 | 4    | 4.63 | 1.15 |
| XNCE                                          | 17 | 2.15 | 0.05 | 9   | 2.15 | 0.05 |     |      |      |      |      |      |
| <b>Lysophosphatidylcholine - LPC</b>          |    |      |      |     |      |      |     |      |      |      |      |      |
| PPC                                           | 64 |      |      |     |      |      | 20  | 1.87 | 0.68 | 10   | 6.67 | 0.46 |
| OPC                                           | 20 |      |      |     |      |      |     |      |      |      |      |      |
| IPC                                           | 18 |      |      |     |      |      | 10  | 2.37 | 1.28 | 5    | 4.67 | 3.68 |

|                                           |      |      |      |      |      |      |      |      |      |      |      |      |
|-------------------------------------------|------|------|------|------|------|------|------|------|------|------|------|------|
| APC                                       | 18   |      |      |      |      |      |      |      |      |      |      |      |
| UPC                                       | 7    |      |      |      |      |      |      |      |      |      |      |      |
| <b>Lysophosphatidylethanolamine – LPE</b> |      |      |      |      |      |      |      |      |      |      |      |      |
| PPE                                       |      |      |      |      |      |      | 5    | 1.29 | 0.17 | 10   | 2.98 | 0.91 |
| IPE                                       |      |      |      |      |      |      | 10   | 1.64 | 0.77 | 20   | 4.52 | 0.02 |
| <b>Diacylglycerol - DAG<sup>b</sup></b>   |      |      |      |      |      |      |      |      |      |      |      |      |
| PODG                                      | 25   | 5.65 | 2.28 | 17   | 5.65 | 2.28 | 13   | 2.18 | 0.05 | 13   | 2.18 | 0.05 |
| PIDG                                      | 23   | 6.54 | 1.55 | 15   | 6.54 | 1.55 |      |      |      |      |      |      |
| PADG                                      | 23   | 5.86 | 1.10 | 15   | 5.86 | 1.10 | 25   | 3.89 | 0.76 | 25   | 3.89 | 0.76 |
| PUDG                                      | 9    | 4.05 | 0.06 | 6    | 4.05 | 0.06 |      |      |      |      |      |      |
| <b>Cholesterol - CHOL<sup>b</sup></b>     |      |      |      |      |      |      |      |      |      |      |      |      |
| CHOL                                      | 3104 | 4.99 | 0.11 | 2656 | 4.99 | 0.11 | 4431 | 3.02 | 0.12 | 4222 | 3.02 | 0.12 |

<sup>a</sup>Lipid lateral diffusion was evaluated for each lipid type from the lipids' MSD in the membrane plane, see SI methods. <sup>b</sup>CHOL, DAG, and CER lipids flip-flop between the leaflets, therefore, their diffusion was determined jointly in both leaflets. The weighted average diffusion rates in the outer/inner leaflet (excluding lipids that flip-flop) are: **Average**  $3.1 \pm 0.3$  /  $4.3 \pm 0.3$  and **Brain**  $1.6 \pm 0.2$  /  $2.8 \pm 0.2$  in  $10^{-7}$  cm<sup>2</sup>/s.

**Supporting References:**

1. Ingólfsson, H.I., M.N. Melo, F.J. van Eerden, C. Arnarez, C.A. Lopez, T.A. Wassenaar, X. Periole, A.H. De Vries, D.P. Tieleman, and S.J. Marrink. 2014. Lipid Organization of the Plasma Membrane. *J. Am. Chem. Soc.* 136: 14554–14559.
2. O'Brien, J.S., and E.L. Sampson. 1965. Lipid composition of the normal human brain: gray matter, white matter, and myelin. *J. Lipid Res.* 6: 537–544.
3. Kishimoto, Y., B.W. Agranoff, N.S. Radin, and R.M. Burton. 1969. Comparison of the fatty acids of lipids of subcellular brain fractions. *Journal of Neurochemistry.* 16: 397–404.
4. Breckenridge, W.C., G. Gombos, and I.G. Morgan. 1972. The lipid composition of adult rat brain synaptosomal plasma membranes. *BBA - Biomembranes.* 266: 695–707.
5. Christie, W.W. 1985. Rapid separation and quantification of lipid classes by high performance liquid chromatography and mass (light-scattering) detection. *J. Lipid Res.* 26: 507–512.
6. Abbott, S.K., P.L. Else, T.A. Atkins, and A.J. Hulbert. 2012. Fatty acid composition of membrane bilayers: Importance of diet polyunsaturated fat balance. *BBA - Biomembranes.* 1818: 1309–1317.
7. Atilla-Gokcumen, G.E., E. Muro, J. Relat-Goberna, S. Sasse, A. Bedigian, M.L. Coughlin, S. Garcia-Manyes, and U.S. Eggert. 2014. Dividing Cells Regulate Their Lipid Composition and Localization. *Cell.* 156: 428–439.
8. Levental, K.R., J.H. Lorent, X. Lin, A.D. Skinkle, M.A. Surma, E.A. Stockenbojer, A.A. Gorfe, and I. Levental. 2016. Polyunsaturated Lipids Regulate Membrane Domain Stability by Tuning Membrane Order. *Biophys. J.* 110: 1800–1810.
9. Tulodziecka, K., B.B. Diaz-Rohrer, M.M. Farley, R.B. Chan, G. Di Paolo, K.R. Levental, M.N. Waxham, and I. Levental. 2016. Remodeling of the postsynaptic plasma membrane during neural development. *Mol. Biol. Cell.* 27: 3480–3489.
10. van Meer, G. 2005. Cellular lipidomics. *EMBO J.* 24: 3159–3165.
11. Fernandez, C., M. Sandin, J.L. Sampaio, P. Almgren, K. Narkiewicz, M. Hoffmann, T. Hedner, B. Wahlstrand, K. Simons, A. Shevchenko, P. James, and O. Melander. 2013. Plasma Lipid Composition and Risk of Developing Cardiovascular Disease. *PLoS ONE.* 8: e71846.
12. Holthuis, J.C.M., and A.K. Menon. 2014. Lipid landscapes and pipelines in membrane homeostasis. *Nature.* 510: 48–57.
13. Wells, M.A., and J.C. Dittmer. 1967. A comprehensive study of the postnatal changes in the concentration of the lipids of developing rat brain. *Biochemistry.* 6: 3169–3175.

14. Lutzke, B.S., and J.M. Braughler. 1990. An Improved Method for the Identification and Quantitation of Biological Lipids by Hplc Using Laser Light-Scattering Detection. *J. Lipid Res.* 31: 2127–2130.
15. Kracun, I., H. Rosner, V. Drnovsek, M. Heffer-Lauc, C. Cosović, and G. Lauc. 1991. Human brain gangliosides in development, aging and disease. *Int. J. Dev. Biol.* 35: 289–295.
16. Diagne, A., J. Fauvel, M. Record, H. Chap, and L. Douste-Blazy. 1984. Studies on ether phospholipids. II. Comparative composition of various tissues from human, rat and guinea pig. *Biochim. Biophys. Acta.* 793: 221–231.
17. Homan, R., and M.K. Anderson. 1998. Rapid separation and quantitation of combined neutral and polar lipid classes by high-performance liquid chromatography and evaporative light-scattering mass detection. *J. Chromatogr. B Biomed. Sci. Appl.* 708: 21–26.
18. Han, X., D.M. Holtzman, and D.W. McKeel. 2001. Plasmalogen deficiency in early Alzheimer's disease subjects and in animal models: molecular characterization using electrospray ionization mass spectrometry. *J. Neurochem.* 77: 1168–1180.
19. Han, X., and R.W. Gross. 2005. Shotgun lipidomics: Electrospray ionization mass spectrometric analysis and quantitation of cellular lipidomes directly from crude extracts of biological samples. *Mass Spectrom. Rev.* 24: 367–412.
20. Sharon, R., I. Bar-Joseph, G.E. Mirick, C.N. Serhan, and D.J. Selkoe. 2003. Altered Fatty Acid Composition of Dopaminergic Neurons Expressing  $\alpha$ -Synuclein and Human Brains with  $\alpha$ -Synucleinopathies. *J. Biol. Chem.* 278: 49874–49881.
21. Chan, R.B., T.G. Oliveira, E.P. Cortes, L.S. Honig, K.E. Duff, S.A. Small, M.R. Wenk, G. Shui, and G. Di Paolo. 2012. Comparative lipidomic analysis of mouse and human brain with Alzheimer disease. *J. Biol. Chem.* 287: 2678–2688.
22. Lam, S.M., Y. Wang, X. Duan, M.R. Wenk, R.N. Kalaria, C.P. Chen, M.K.P. Lai, and G. Shui. 2014. The brain lipidomes of subcortical ischemic vascular dementia and mixed dementia. *Neurobiol. Aging.* 35: 2369–2381.
23. Arai, Y., J.L. Sampaio, M. Wilsch-Bräuninger, A.W. Ettinger, C. Haffner, and W.B. Huttner. 2015. Lipidome of midbody released from neural stem and progenitor cells during mammalian cortical neurogenesis. *Front. Cell. Neurosci.* 9: 428–411.
24. Oliveira, T.G., R.B. Chan, F.V. Bravo, A. Miranda, R.R. Silva, B. Zhou, F. Marques, V. Pinto, J.J. Cerqueira, G. Di Paolo, and N. Sousa. 2015. The impact of chronic stress on the rat brain lipidome. *Mol. Psychiatry.* 21: 80–88.
25. Shevchenko, A., and K. Simons. 2010. Lipidomics: coming to grips with lipid diversity. *Nat. Rev. Mol. Cell Biol.* 11: 593–598.
26. Clark, J., K.E. Anderson, V. Juvin, T.S. Smith, F. Karpe, M.J.O. Wakelam, L.R. Stephens,

- and P.T. Hawkins. 2011. Quantification of PtdInsP3 molecular species in cells and tissues by mass spectrometry. *Nat. Meth.* 8: 267–272.
27. Marrink, S.J., A.H. De Vries, and A.E. Mark. 2004. Coarse grained model for semiquantitative lipid simulations. *J. Phys. Chem. B.* 108: 750–760.
  28. Marrink, S.J., H.J. Risselada, S. Yefimov, D.P. Tieleman, and A.H. De Vries. 2007. The MARTINI force field: coarse grained model for biomolecular simulations. *J. Phys. Chem. B.* 111: 7812–7824.
  29. Wassenaar, T.A., H.I. Ingólfsson, R.A. Böckmann, D.P. Tieleman, and S.J. Marrink. 2015. Computational Lipidomics with insane: A Versatile Tool for Generating Custom Membranes for Molecular Simulations. *J. Chem. Theory Comput.* 11: 2144–2155.
  30. Gu, R.-X., H.I. Ingólfsson, A.H. De Vries, S.J. Marrink, and D.P. Tieleman. 2017. Ganglioside-Lipid and Ganglioside-Protein Interactions Revealed by Coarse-Grained and Atomistic Molecular Dynamics Simulations. *J. Phys. Chem. B.* 121: 3262–3275.
  31. Lopez, C.A., Z. Sovova, F.J. van Eerden, A.H. De Vries, and S.J. Marrink. 2013. Martini force field parameters for glycolipids. *J. Chem. Theory Comput.* 9: 1694–1708.
  32. Pronk, S., S. Páll, R. Schulz, P. Larsson, P. Bjelkmar, R. Apostolov, M.R. Shirts, J.C. Smith, P.M. Kasson, D. van der Spoel, B. Hess, and E. Lindahl. 2013. GROMACS 4.5: a high-throughput and highly parallel open source molecular simulation toolkit. *Bioinformatics.* 29: 845–854.
  33. de Jong, D.H., S. Baoukina, H.I. Ingólfsson, and S.J. Marrink. 2016. Martini straight: Boosting performance using a shorter cutoff and GPUs. *Comput. Phys. Commun.* 199: 1–7.
  34. Bussi, G., D. Donadio, and M. Parrinello. 2007. Canonical sampling through velocity rescaling. *J. Chem. Phys.* 126: 014101.
  35. Parrinello, M., and A. Rahman. 1981. Polymorphic transitions in single crystals: A new molecular dynamics method. *J. Appl. Phys.* 52: 7182–7190.
  36. Michaud-Agrawal, N., E.J. Denning, T.B. Woolf, and O. Beckstein. 2011. MDAAnalysis: A toolkit for the analysis of molecular dynamics simulations. *J. Comput. Chem.* 32: 2319–2327.
  37. Xie, H., K.T. McDonnell, and H. Qin. 2004. *Surface Reconstruction of Noisy and Defective Data Sets*. Washington, DC, USA: IEEE Computer Society. pp. 259–266.
  38. Kazhdan, M., M. Bolitho, and H. Hoppe. 2006. *Poisson Surface Reconstruction*. Aire-la-Ville, Switzerland, Switzerland: Eurographics Association. pp. 61–70.
  39. Floater, M.S., and K. Hormann. 2005. *Surface Parameterization: a Tutorial and Survey*. In: Dodgson NA, MS Floater, MA Sabin, editors. *Advances in Multiresolution for Geometric Modelling*. Berlin, Heidelberg: Springer Berlin Heidelberg. pp. 157–186.

40. Venable, R.M., H.I. Ingólfsson, M.G. Lerner, B.S. Perrin, B.A. Camley, S.J. Marrink, F.L.H. Brown, and R.W. Pastor. 2017. Lipid and Peptide Diffusion in Bilayers: The Saffman-Delbrück Model and Periodic Boundary Conditions. *J. Phys. Chem. B.* 121: 3443–3457.
41. Castillo, N., L. Monticelli, J. Barnoud, and D.P. Tieleman. 2013. Free energy of WALP23 dimer association in DMPC, DPPC, and DOPC bilayers. *Chem. Phys. Lipids.* 169: 95–105.
42. Chavent, M., T. Reddy, J. Goose, A.C.E. Dahl, J.E. Stone, B. Jobard, and M.S.P. Sansom. 2014. Methodologies for the analysis of instantaneous lipid diffusion in md simulations of large membrane systems. *Faraday Discuss.* 169: 455–475.
43. Bremer, P.-T., G.H. Weber, V. Pascucci, M. Day, and J.B. Bell. 2010. Analyzing and tracking burning structures in lean premixed hydrogen flames. *IEEE Trans. Vis. Comput. Graph.* 16: 248–260.
44. Bennett, J.C., V. Krishnamoorthy, S. Liu, R.W. Grout, E.R. Hawkes, J.H. Chen, J. Shepherd, V. Pascucci, and P.-T. Bremer. 2011. Feature-based statistical analysis of combustion simulation data. *IEEE Trans. Vis. Comput. Graph.* 17: 1822–1831.
